# Supplementary material for: Early Infiltration of Innate Immune Cells to the Liver Depletes HNF4α and Promotes Extrahepatic Carcinogenesis
Source: PubMed Central journal article supplement — Cancer Discov. 2023 Mar 27;13(7):1616–35. doi: 10.1158/2159-8290.CD-22-1062 (PMC10326600; doi:10.1158/2159-8290.cd-22-1062), 2023-03-27
Supplement: cd-22-1062_supplementary_extended_data_1_suppsd1.pdf [file cd-22-1062_supplementary_extended_data_1_suppsd1.pdf]

# Supplementary Extended data 1: FACS gating strategy

## Liver neutrophils sub-populations

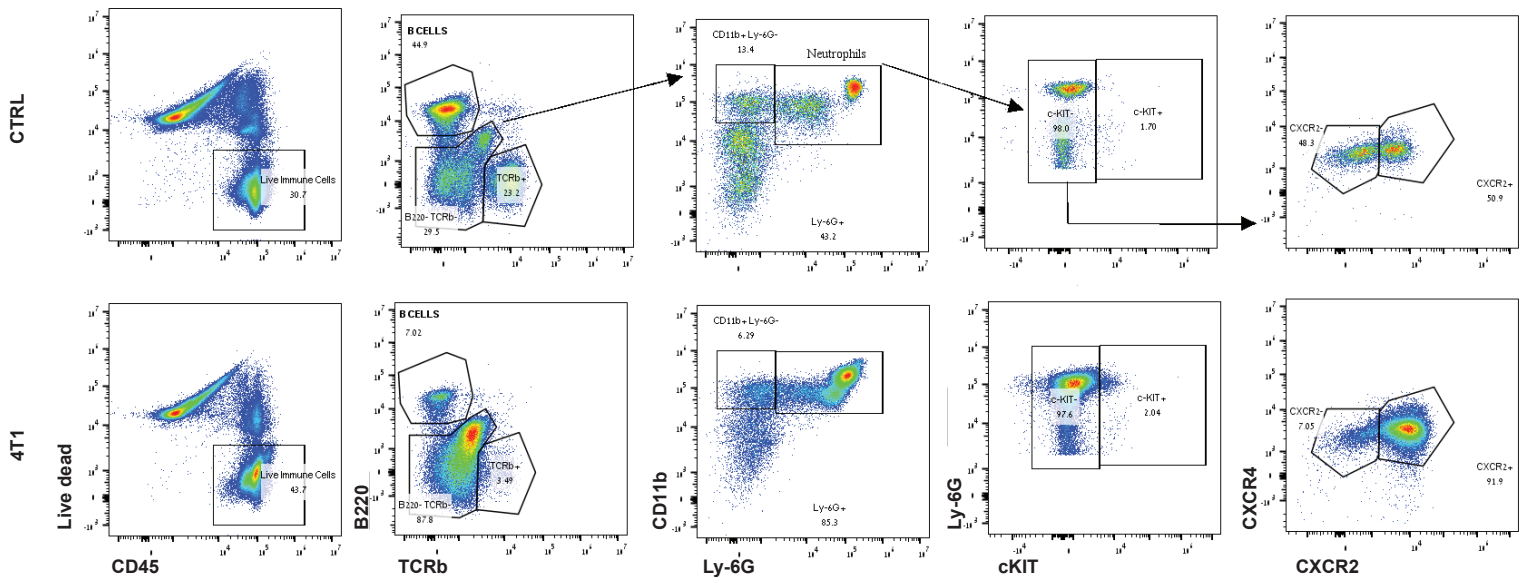

## Liver pERK MFI

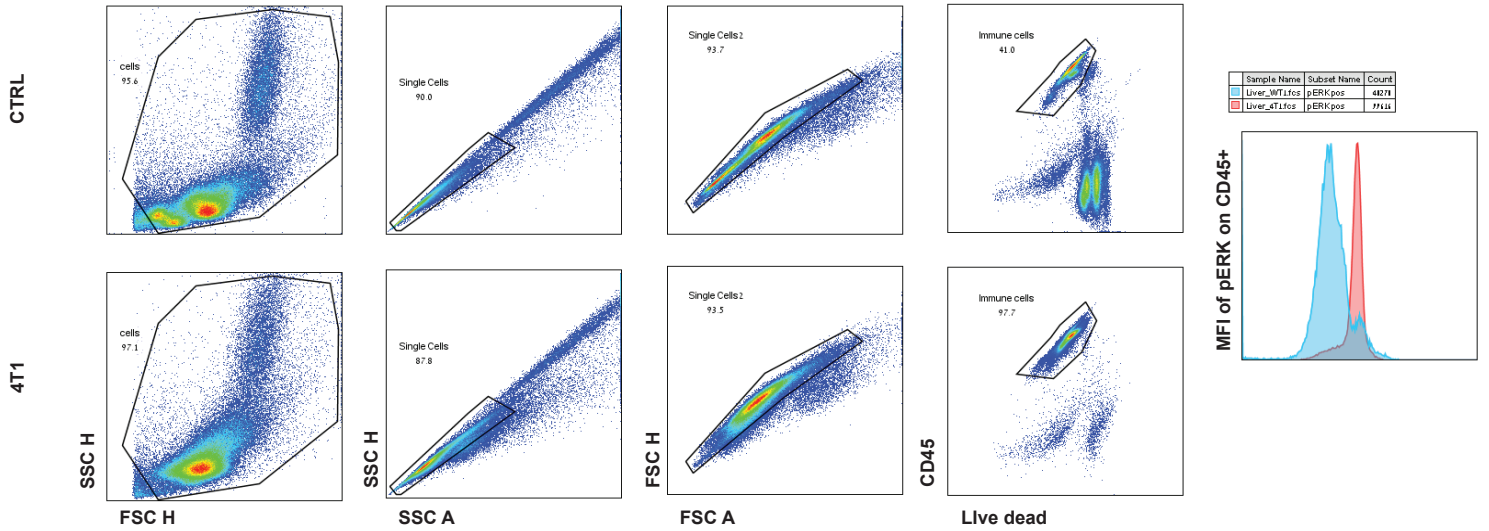

## Spleenocytes activation

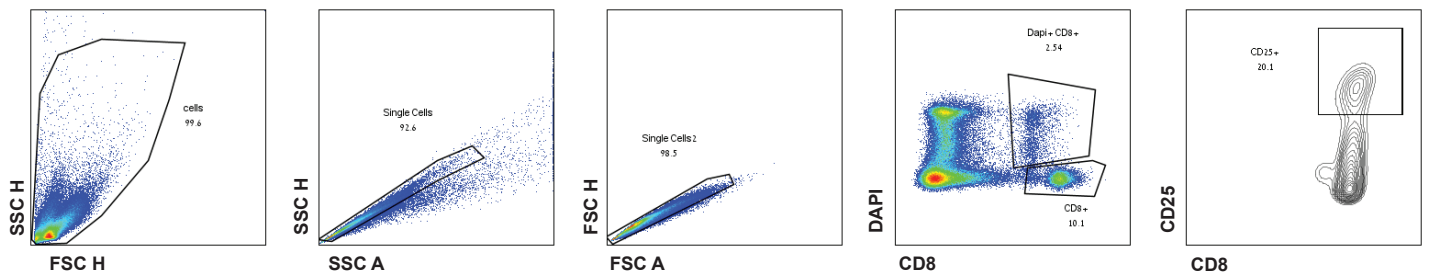

**KPC-immune cells population-blood**

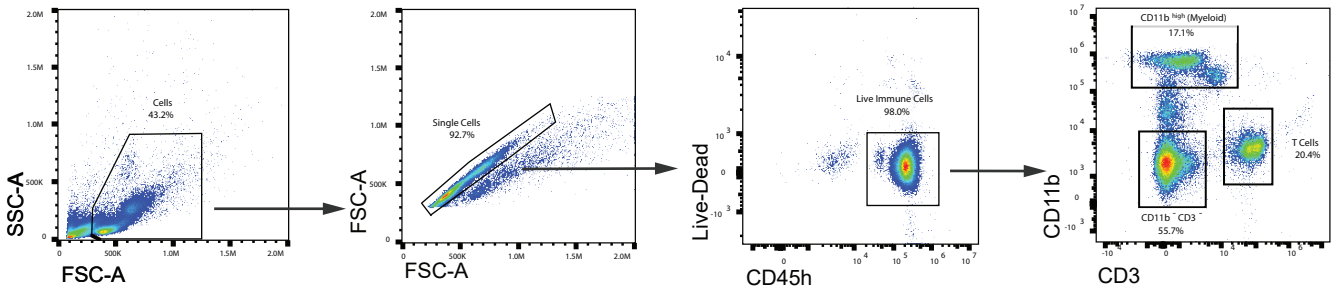

**Out of CD3<sup>-</sup> CD11b<sup>-</sup>**

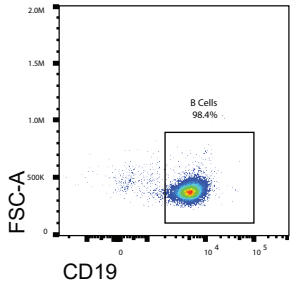

**Out of Myeloid**

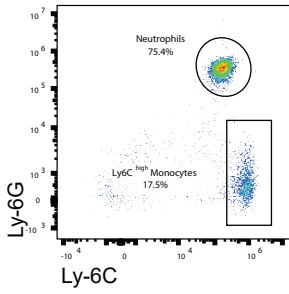

**Out of Ly6C<sup>high</sup> Monocytes**

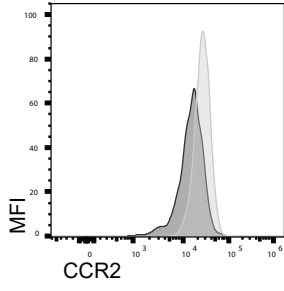

Legend:  
 KPC (light grey)  
 PBS (dark grey)

**KPC-immune cells population-liver**

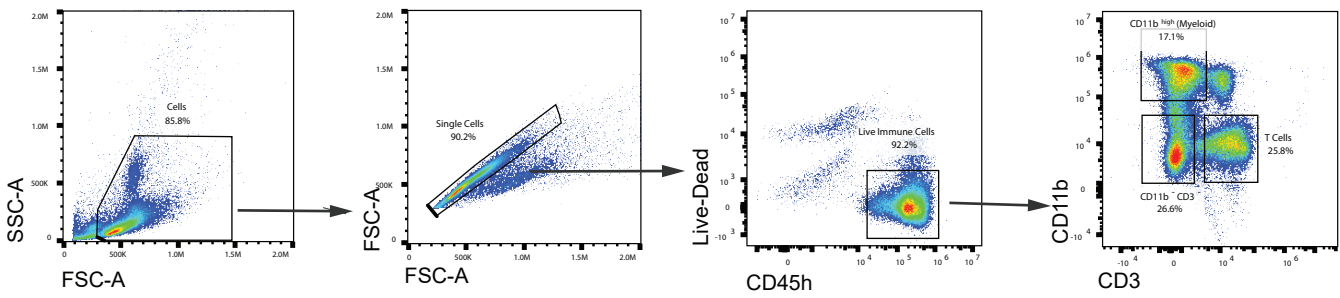

**Out of CD3<sup>-</sup> CD11b<sup>-</sup>**

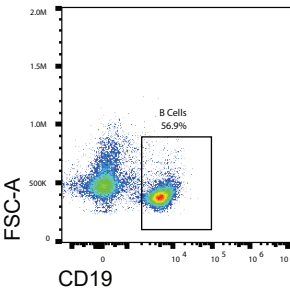

**Out of Myeloid**

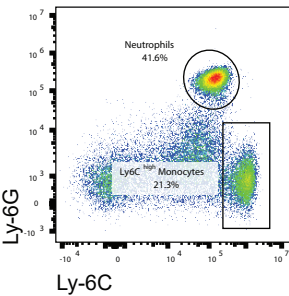

**Out of Ly6C<sup>high</sup> Monocytes**

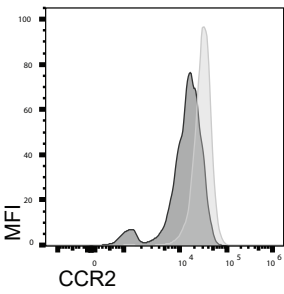

Legend:  
 KPC (light grey)  
 PBS (dark grey)
