# Supplementary material for: Early Infiltration of Innate Immune Cells to the Liver Depletes HNF4α and Promotes Extrahepatic Carcinogenesis
Source: PubMed Central journal article supplement — Cancer Discov. 2023 Mar 27;13(7):1616–35. doi: 10.1158/2159-8290.CD-22-1062 (PMC10326600; doi:10.1158/2159-8290.cd-22-1062), 2023-03-27
Supplement: cd-22-1062_supplementary_table_s1_suppst1.pdf [file cd-22-1062_supplementary_table_s1_suppst1.pdf]

Supplementary Table S1: Genes regulated by HNF4a

Aadat  
Aass  
Abat  
Acad11  
Acadm  
Acot13  
Acy1  
Afm  
Agmat  
Agt  
Agxt  
Ahcy  
Alb  
Aldh1l1  
Aldh6a1  
Amdhd1  
Amt  
Apoa2  
Apoc3  
ApoH  
Aqp11  
Ass1  
Atl2  
Atp1b1  
Atp5c1  
Atp5f1  
Atp5j2  
Azgp1  
Baat  
Bphl  
C8g  
Cat  
Cisd1  
Clybl  
Cmc1  
Cox5a  
Cpt2  
Cth  
Cutc  
Cyc1  
Cyp17a1  
Dcaf11  
Decr1  
Dera  
Dhrs3  
Eci1  
Eci2

Ehhadh  
Ephx2  
Esd  
Etfa  
Etfb  
Etfdh  
Etnppl  
Fabp1  
Fahd1  
Fam213b  
Ftcd  
G6pc  
Galm  
Gbe1  
Gcat  
Gcdh  
Gckr  
Glo1  
Gm2a  
Gpt  
Gsta2  
Gstk1  
Gsto1  
Gstt1  
Haao  
Hagh  
Hgd  
Hnmt  
Hpd  
Hsd17b11  
Idh3b  
Immt  
Inca1  
Inmt  
Klkb1  
Kmo  
Leap2  
Maob  
Marc1  
Mccc2  
Mcee  
Mrpl1  
Mrpl15  
Mrps31  
Mtch2  
Ndrp2  
Ndufb10

Ndufs1  
Ndufs7  
Nipsnap1  
Nqo2  
Nubpl  
Nudt7  
Odf3b  
Osgepl1  
Paics  
Pecr  
Pfkf  
Phyh  
Pklr  
Plin2  
Pxmp2  
Pygl  
Qdpr  
Rap1gap  
Rmnd1  
Rpp40  
Rwdd3  
S100a1  
Sardh  
Sdhd  
Selenbp1  
Seph2  
Serpinb9  
Serpinf1  
Sfxn1  
Shmt1  
Shpk  
Sirt5  
Slc17a1  
Slc26a1  
Slc27a5  
Slc47a1  
Slc6a12  
Sod1  
Sod2  
Stard7  
Sucla2  
Sugct  
Sult1c2  
Suox  
Taco1  
Tcea3  
Timm44

Trib3  
Txnrd2  
Tymp  
Ugp2  
Ugt2a3  
Uqcr10  
Uroc1  
Zfand6
