# Supplementary material for: Early Infiltration of Innate Immune Cells to the Liver Depletes HNF4α and Promotes Extrahepatic Carcinogenesis
Source: PubMed Central journal article supplement — Cancer Discov. 2023 Mar 27;13(7):1616–35. doi: 10.1158/2159-8290.CD-22-1062 (PMC10326600; doi:10.1158/2159-8290.cd-22-1062), 2023-03-27
Supplement: cd-22-1062_supplementary_table_s2_suppst2.pdf [file cd-22-1062_supplementary_table_s2_suppst2.pdf]

Supplementary Table S2: Liver score and survival data for PDAC patients from Souraski and Sheba medical centers

| Patient number | Sex | Age at first oncology visit | distal pancreatectomy |                        | Survival months   | Days_from Visit_to BMI_First |
|----------------|-----|-----------------------------|-----------------------|------------------------|-------------------|------------------------------|
|                |     |                             | Whipple Surg_date     | date Dead 1 or alive 0 |                   |                              |
| 697            | F   | 63.91507                    |                       | 0                      | 21.42127 9.743654 | 0                            |
| 389            | F   | 49.36438                    |                       | 1                      | 20.75286 17.15508 | 9                            |
| 352            | F   | 66.17808                    |                       | 1                      | 17.19031 0.513812 | -32                          |
| 681            | m   | 75.47945                    |                       | 1                      | 10.63266 25.25091 | -13                          |
| 1105           | m   | 70.8                        |                       | 1                      | 10.62803 5        | -0.6                         |
| 674            | m   | 69.57808                    |                       | 1                      | 10.18079 4.621522 | -11                          |
| 333            | m   | 67.9863                     |                       | 1                      | 10.15731 34.92061 | 811                          |
| 690            | F   | 61.94795                    |                       | 1                      | 9.164413 2.722978 | -13                          |
| 1100           | m   | 73.9                        |                       | 1                      | 8.975019 4        | -9.0                         |
| 693            | F   | 60.46849                    |                       | 1                      | 8.329455 25.7896  | -12                          |
| 684            | m   | 80.57808                    |                       | 0                      | 8.22712 2.401249  | -8                           |
| 1096           | F   | 69.2                        |                       | 1                      | 8.051382 11       | -17.3                        |
| 661            | m   | 68.06849                    |                       | 1                      | 7.628342 2.146663 | 7                            |
| 632            | m   | 90.06849                    |                       | 0                      | 7.002052 -0.43305 | -21                          |
| 671            | m   | 84.19452                    |                       | 1                      | 7.000148 6.321492 | 0                            |
| 678            | F   | 67.94795                    |                       | 0                      | 6.969435 0.065854 | 0                            |
| 1043           | F   | 72.8                        |                       | 1                      | 6.939352 0        | 3.0                          |
| 651            | m   | 59.23014                    |                       | 0                      | 6.894117 20.50172 | -3                           |
| 534            | m   | 60.10685                    |                       | 1                      | 6.84748 1.053138  | 1                            |
| 666            | m   | 78.70411                    |                       | 1                      | 6.842477 6.289648 | -12                          |
| 685            | m   | 65.76438                    |                       | 0                      | 6.734799 11.06971 | 12                           |
| 1104           | F   | 60.8                        |                       | 1                      | 6.673232 12       | 0.9                          |
| 245            | m   | 65.1726                     |                       | 0                      | 6.635103 34.30708 | 0                            |
| 691            | F   | 75.8137                     |                       | 1                      | 6.448265 4.185051 | 4                            |
| 1092           | m   | 70.4                        |                       | 1                      | 6.448075 11       | 0.0                          |
| 332            | m   | 76.28767                    |                       | 1                      | 6.42837 3.248798  | -8                           |
| 667            | F   | 89.40822                    |                       | 1                      | 6.14783 10.58691  | -15                          |
| 646            | m   | 60.39726                    |                       | 1                      | 5.972992 4.015198 | 2                            |
| 837            | F   | 58.17534                    |                       | 1                      | 5.886407 3.671316 | 0                            |
| 614            | m   | 84.07671                    |                       | 1                      | 5.845225 7.620908 | -29                          |
| 679            | F   | 67.4274                     |                       | 1                      | 5.696328 10.65647 | 8                            |
| 626            | m   | 75.00548                    |                       | 0                      | 5.681156 3.06337  | 7                            |
| 629            | m   | 83.63562                    |                       | 1                      | 5.667421 3.050773 | 1                            |
| 673            | F   | 68.79178                    |                       | 1                      | 5.604581 10.81478 | -31                          |
| 612            | m   | 64.0411                     |                       | 1                      | 5.602516 2.185514 | 0                            |
| 713            | F   | 77.43288                    |                       | 1                      | 5.588957 4.753035 | 4                            |
| 662            | m   | 64.95616                    |                       | 0                      | 5.588814 14.0328  | -3                           |
| 433            | F   | 67.90137                    |                       | 1                      | 5.422807 2.778565 | -105                         |
| 477            | m   | 90.94247                    |                       | 1                      | 5.286456 2.387614 | 27                           |
| 874            | m   | 69.19178                    |                       | 1                      | 5.184833 6.685279 | -34                          |
| 523            | F   | 70.59726                    |                       | 1                      | 5.159024 1.918532 | 28                           |
| 640            | m   | 38.18904                    |                       | 1                      | 5.03233 11.31098  | 1                            |
| 1101           | m   | 67.0                        |                       | 1                      | 4.984626 5        | 20.5                         |
| 638            | m   | 64.72329                    |                       | 1                      | 4.841966 25.44532 | 0                            |
| 287            | m   | 71.12055                    |                       | 0                      | 4.833654 37.22747 | 2                            |
| 769            | F   | 61.09315                    |                       | 0                      | 4.802076 0.032477 | 0                            |

|      |   |          |       |   |          |          |       |
|------|---|----------|-------|---|----------|----------|-------|
| 641  | F | 54.83288 |       | 1 | 4.766514 | 10.4086  | 4     |
| 677  | F | 62.2274  |       | 1 | 4.761323 | 2.85315  | 0     |
| 624  | m | 72.07123 |       | 1 | 4.716032 | 2.651401 | 0     |
| 687  | F | 70.12877 |       | 1 | 4.683182 | 8.885279 | -6    |
| 178  | F | 80.67397 |       | 1 | 4.67166  | 22.78202 | -839  |
| 464  | F | 73.03288 | ##### | 0 | 4.620724 | 48.59902 | 9     |
| 1102 | m | 56.2     |       | 0 | 4.575108 | 14       | 23.8  |
| 141  | m | 82.44932 | ##### | 1 | 4.570407 | 21.67882 | 0     |
| 561  | F | 69.38904 |       | 1 | 4.541575 | 2.587657 | 7     |
| 301  | F | 74.89041 |       | 1 | 4.510962 | 0.018902 | 0     |
| 737  | F | 67.6274  |       | 1 | 4.391693 | 0.048056 | -31   |
| 912  | m | 91.20274 |       | 1 | 4.307879 | 11.78056 | -5    |
| 589  | m | 55.69863 |       | 1 | 4.305548 | 14.22172 | -4    |
| 587  | m | 69.01644 |       | 1 | 4.289744 | 12.08663 | 14    |
| 635  | m | 49.07123 |       | 1 | 4.25092  | 3.146949 | -8    |
| 1093 | F | 84.5     |       | 1 | 4.166624 | 10       | -7.0  |
| 69   | F | 51.43014 |       | 1 | 4.157552 | 1.220357 | -273  |
| 896  | m | 67.26575 |       | 0 | 4.141153 | 39.14072 | -25   |
| 676  | F | 79.72603 |       | 1 | 4.098211 | 3.317634 | 0     |
| 1089 | F | 35.9     |       | 1 | 4.08757  | 1        | 6.9   |
| 1098 | m | 55.8     |       | 1 | 4.063635 | 10       | 21.9  |
| 484  | F | 64.29589 |       | 1 | 3.938735 | 4.64952  | -18   |
| 1090 | F | 74.0     |       | 1 | 3.918856 | 6        | 5.9   |
| 524  | F | 80.57534 |       | 1 | 3.899344 | 4.918214 | 107   |
| 669  | F | 72.79726 |       | 1 | 3.876379 | 7.753181 | -8    |
| 349  | m | 71.65479 |       | 1 | 3.872054 | 11.27893 | -15   |
| 607  | m | 80.24384 |       | 1 | 3.868713 | 9.288714 | -3    |
| 1103 | m | 43.9     |       | 1 | 3.865387 | 18       | -0.3  |
| 337  | F | 73.92055 |       | 1 | 3.859431 | 12.82044 | 21    |
| 597  | m | 80.60274 |       | 1 | 3.856216 | 1.285242 | 5     |
| 628  | m | 53.90137 |       | 0 | 3.841433 | 3.034537 | -13   |
| 559  | m | 74.41918 |       | 1 | 3.832698 | 12.65366 | 0     |
| 680  | m | 76.49863 |       | 1 | 3.826892 | 0.65467  | 1     |
| 1099 | m | 72.9     |       | 0 | 3.783298 | 42       | -10.9 |
| 622  | m | 67.93425 |       | 1 | 3.75693  | 8.078431 | 182   |
| 905  | F | 81.89863 |       | 1 | 3.737088 | 14.64918 | 39    |
| 456  | m | 61.12603 |       | 1 | 3.716457 | 2.047454 | 0     |
| 582  | m | 54.37534 |       | 0 | 3.67489  | 40.47891 | -5    |
| 491  | m | 68.40274 |       | 1 | 3.67348  | 5.513757 | 8     |
| 483  | m | 61.12055 |       | 1 | 3.572058 | 4.613443 | 12    |
| 623  | m | 67.03014 |       | 0 | 3.570076 | 2.543318 | -3    |
| 619  | m | 70.00822 |       | 1 | 3.56187  | 8.918577 | 0     |
| 806  | F | 74.95616 |       | 1 | 3.558847 | 17.78561 | -7    |
| 521  | F | 78.6411  |       | 1 | 3.553108 | 1.586419 | 1     |
| 647  | F | 87.52877 |       | 1 | 3.545858 | 9.818417 | 2     |
| 330  | m | 73.89315 |       | 1 | 3.529469 | 4.079971 | 0     |
| 504  | m | 66.68767 |       | 1 | 3.510883 | 0.855013 | 2     |
| 645  | F | 64.9726  |       | 1 | 3.478942 | 28.0867  | -15   |
| 133  | m | 72.05205 |       | 0 | 3.471727 | 1.377496 | 37    |
| 25   | m | 80.79452 |       | 1 | 3.467414 | 13.44525 | -39   |

|      |   |          |       |       |          |          |          |     |
|------|---|----------|-------|-------|----------|----------|----------|-----|
| 1094 | F | 67.7     |       | 1     | 3.455468 | 5        | -16.1    |     |
| 461  | m | 78.53425 |       | 1     | 3.43327  | 5.112457 | -4       |     |
| 1097 | m | 65.7     |       | 1     | 3.422164 | 15       | -8.7     |     |
| 17   | m | 53.54795 |       | 1     | 3.405921 | 7.385195 | 201      |     |
| 1085 | F | 71.3     |       | 1     | 3.36676  | 14       | 20.6     |     |
| 808  | m | 68.32603 |       | 0     | 3.342515 | 0.735518 |          |     |
| 654  | F | 57.58356 |       | 1     | 3.33913  | 5.113437 | 0        |     |
| 934  | m | 52.22192 |       | 0     | 3.302256 | 2.363423 | -68      |     |
| 643  | F | 44.03288 |       | 0     | 3.285548 | 0.965679 | 0        |     |
| 409  | m | 69.45205 |       | 1     | 3.283028 | 2.480558 | 33       |     |
| 596  | m | 69.40274 |       | 1     | 3.275477 | 0.946474 | 6        |     |
| 630  | m | 57.82192 |       | 1     | 3.163112 | 4.717639 | 9        |     |
| 672  | F | 30.60822 |       | 0     | 3.160083 | -0.12447 | 7        |     |
| 818  | m | 42.96164 |       | 1     | 3.158721 | 7.954712 | 0        |     |
| 600  | m | 75.73973 |       | 1     | 3.149103 | 4.049457 | 5        |     |
| 801  | m | 66.2411  |       | 1     | 3.098471 | 0.31681  | -1827    |     |
| 1082 | m | 59.2     |       | 1     | 3.080523 | 63       | -2.5     |     |
| 652  | m | 92.2274  |       | 1     | 3.034812 | 0.250418 | -10      |     |
| 637  | F | 78.68219 |       | 1     | 3.02258  | 4.408842 | 0        |     |
| 617  | F | 62.8411  |       | 1     | 3.002203 | 23.47898 | 177      |     |
| 908  | F | 68.93699 |       | 1     | 2.98979  | 0.252247 | 5        |     |
| 258  | m | 54.27945 | ##### | 1     | 2.961343 | 12.27544 | 0        |     |
| 550  | m | 67.63562 |       | 1     | 2.955476 | 9.422223 | 9        |     |
| 574  | F | 80.45753 |       | 0     | 2.947866 | 1.665185 | 7        |     |
| 583  | m | 75.95068 |       | 1     | 2.942305 | 2.549043 | 22       |     |
| 613  | m | 74.03836 |       | 1     | 2.932824 | 1.416253 | -6       |     |
| 1087 | m | 78.4     |       | 1     | 2.931975 | 12       | -11.2    |     |
| 537  | m | 66.86849 |       | 0     | 2.909109 | 38.33881 | 10       |     |
| 761  | m | 59.16164 |       | 1     | 2.902693 | 2.651426 | 0        |     |
| 536  | F | 69.7863  |       | 1     | 2.891823 | 0.813579 | 15       |     |
| 1061 | m | 74.6     |       | 1     | 2.87411  | 5        | -2.1     |     |
| 1077 | m | 55.5     |       | 1     | 2.857706 | 9        | 0.6      |     |
| 1071 | m | 72.9     |       | 1     | 2.851727 | 0        | 3.9      |     |
| 575  | m | 66.58356 |       | 1     | 2.848864 | 16.45226 | 2        |     |
| 1081 | F | 74.5     |       | 1     | 2.821306 | 9        | 16.9     |     |
| 615  | m | 69.70137 |       | 0     | 2.81927  | 20.33822 | -14      |     |
| 380  | m | 72.99726 |       | 1     | 2.803781 | 5.786055 | -6       |     |
| 576  | F | 72.12055 |       | 1     | 2.8012   | 10.88543 | 6        |     |
| 658  | m | 60.50411 |       | 1     | 2.800357 | 0.419772 | 0        |     |
| 552  | m | 68.76986 |       | 1     | 2.785172 | 4.317783 | 28       |     |
| 609  | m | 79.47945 |       | 0     | 2.761994 | 10.53614 | 6        |     |
| 428  | m | 66.69041 |       | 0     | 2.757836 | 15.17881 | 0        |     |
| 341  | m | 63.26301 | ##### | 1     | 2.753768 | 18.31199 | 20       |     |
| 568  | m | 58.26027 |       | 1     | 2.747941 | 0.982446 | 8        |     |
| 1095 | F | 45.3     |       | 0     | 2.735054 | 30       | -0.5     |     |
| 663  | F | 62.9863  |       | 0     | 2.724924 | 26.90358 | -8       |     |
| 1063 | m | 49.1     |       | 1     | 2.718482 | 1        | -5.5     |     |
| 198  | F | 84.09863 | ##### | 1     | 2.715377 | 5.855633 | -37      |     |
| 109  | F | 87.93973 |       | ##### | 1        | 2.681845 | 8.454025 | -27 |
| 556  | m | 78.49589 |       | 1     | 2.67764  | 1.549544 | 2        |     |

|      |   |          |       |       |          |          |          |    |
|------|---|----------|-------|-------|----------|----------|----------|----|
| 625  | m | 49.2     |       | 1     | 2.675115 | 10.17732 | 2        |    |
| 655  | F | 56.9726  |       | 1     | 2.643206 | 14.25426 | 11       |    |
| 1078 | m | 70.8     |       | 1     | 2.641396 | 1        | 9.6      |    |
| 547  | m | 74.92055 |       | 1     | 2.626364 | 0.919993 | 0        |    |
| 696  | F | 84.37534 |       | 1     | 2.624294 | 0.542995 | 11       |    |
| 577  | m | 70.15342 |       | 0     | 2.622408 | 39.19675 | 3        |    |
| 202  | F | 69.41644 |       | 0     | 2.607026 | 70.00319 | 7        |    |
| 603  | m | 19.92055 |       | 0     | 2.593885 | 10.96828 | 0        |    |
| 585  | m | 49.17808 |       | 0     | 2.593328 | 4.533929 | 0        |    |
| 542  | m | 71.81644 |       | 1     | 2.58836  | 2.221009 | 0        |    |
| 329  | F | 44.34795 | ##### | 0     | 2.575371 | 67.44085 | 5        |    |
| 432  | m | 50.81644 |       | 1     | 2.562248 | 0.653558 | 0        |    |
| 544  | m | 82.28493 |       | 1     | 2.53557  | 11.75498 | 15       |    |
| 1091 | m | 45.8     |       | 1     | 2.520711 | 4        | -4.0     |    |
| 425  | m | 53       |       | 0     | 2.518259 | 26.93599 | 0        |    |
| 396  | F | 63.09863 |       | 1     | 2.516172 | 51.34441 | 72       |    |
| 642  | F | 58.65753 |       | 1     | 2.513268 | 7.649056 | 11       |    |
| 465  | F | 52.4274  | ##### | 0     | 2.512435 | 44.64177 | -5       |    |
| 763  | m | 81.73973 |       | 1     | 2.505684 | 1.088673 | 7        |    |
| 588  | m | 73.23562 |       | 1     | 2.475585 | 6.683809 | 14       |    |
| 506  | F | 66.70411 |       | 0     | 2.472335 | 61.56793 | 0        |    |
| 549  | m | 63.9863  |       | 1     | 2.465171 | 14.00934 | 0        |    |
| 359  | m | 69.76164 |       | 0     | 2.456219 | 0.369084 | 0        |    |
| 660  | F | 68.99726 |       | 1     | 2.434996 | 9.315366 | 15       |    |
| 564  | F | 80.03562 |       | 1     | 2.430154 | 4.986564 | 0        |    |
| 657  | F | 64.05479 |       | 1     | 2.421311 | 7.617458 | 7        |    |
| 782  | F | 74.96986 |       | 1     | 2.417012 | 2.688695 | 3        |    |
| 567  | m | 68.04658 |       | 1     | 2.415033 | 1.685637 | 0        |    |
| 551  | m | 46.87671 |       | 1     | 2.406661 | 7.582075 | -16      |    |
| 1058 | m | 62.0     |       | 1     | 2.401439 | 34       | 0.9      |    |
| 777  | F | 73.13425 |       | 1     | 2.395194 | 1.253672 | -7       |    |
| 1    | F | 63.37808 | ##### | 1     | 2.382745 | 28.01293 | 21       |    |
| 197  | m | 26.5726  |       | ##### | 0        | 2.382311 | 38.27336 | 36 |
| 515  | m | 62.25205 |       | 1     | 2.369608 | 65.72227 | 10       |    |
| 565  | F | 71.46575 |       | 1     | 2.355434 | 4.255282 | 15       |    |
| 528  | m | 63.49589 |       | 1     | 2.348253 | 1.050788 | -7       |    |
| 532  | F | 61.82466 |       | 1     | 2.34656  | 7.511907 | 0        |    |
| 580  | m | 67.86575 |       | 1     | 2.337047 | 16.94993 | -11      |    |
| 586  | m | 59.16164 |       | 0     | 2.324361 | 22.16537 | 6        |    |
| 593  | m | 71.09589 |       | 1     | 2.323776 | 2.280507 | -27      |    |
| 822  | m | 60.59178 |       | 1     | 2.306033 | 4.082876 | 8        |    |
| 130  | F | 60.03288 |       | 1     | 2.303867 | 1.084918 | 5        |    |
| 633  | F | 67.5589  |       | 1     | 2.290971 | 9.516496 | 3        |    |
| 545  | F | 80.69315 |       | 1     | 2.27465  | 4.251537 | 3        |    |
| 401  | m | 72.4274  |       | 1     | 2.272601 | 1.218778 | 3        |    |
| 595  | m | 85.50685 |       | 1     | 2.261257 | 9.082778 | 18       |    |
| 452  | F | 83.46027 |       | 1     | 2.260453 | 0.213967 | 35       |    |
| 803  | m | 60.93425 |       | 1     | 2.257209 | 1.017191 | -17      |    |
| 601  | F | 49.38082 |       | 1     | 2.256732 | 33.45423 | 0        |    |
| 72   | F | 75.86849 |       | 1     | 2.246599 | 1.590486 | 2        |    |

|      |   |          |       |   |          |          |      |
|------|---|----------|-------|---|----------|----------|------|
| 485  | m | 70.20274 |       | 0 | 2.24632  | 24.2634  | 0    |
| 66   | F | 77.75068 | ##### | 0 | 2.239691 | 6.099191 | -59  |
| 786  | m | 71.96712 |       | 1 | 2.226268 | 1.555161 | 0    |
| 631  | F | 68.85479 |       | 1 | 2.213159 | 1.989836 | -2   |
| 374  | m | 61.99726 |       | 0 | 2.204139 | 53.69322 | -7   |
| 1059 | m | 76.1     |       | 1 | 2.201991 | 1        | 1.8  |
| 501  | m | 64.71233 |       | 1 | 2.20128  | 14.78517 | 58   |
| 664  | F | 66.81918 |       | 1 | 2.196126 | 13.41998 | 24   |
| 442  | m | 66.3726  |       | 0 | 2.191388 | 0.469311 | -44  |
| 573  | F | 48.19726 |       | 0 | 2.189268 | 60.89847 | 148  |
| 92   | m | 64.65753 |       | 1 | 2.182686 | 6.62106  | 0    |
| 174  | m | 88.56164 |       | 1 | 2.160738 | 4.554398 | 8    |
| 239  | m | 63.57808 | ##### | 0 | 2.148234 | 52.93652 | -10  |
| 558  | F | 78.6274  |       | 1 | 2.146168 | 7.220481 | 5    |
| 649  | F | 74.01918 |       | 1 | 2.125441 | 2.918787 | 0    |
| 1079 | m | 51.9     |       | 0 | 2.123149 | 20       | 23.9 |
| 266  | F | 52.33425 |       | 1 | 2.123082 | 24.78713 | 0    |
| 533  | m | 55.69041 |       | 0 | 2.118788 | 6.834251 | 1    |
| 413  | m | 64.56164 |       | 0 | 2.115325 | 0.031091 | 0    |
| 527  | F | 68.19178 |       | 1 | 2.104261 | 4.254394 | 2    |
| 500  | m | 73.55616 |       | 1 | 2.104128 | 4.687219 | -78  |
| 1084 | m | 76.8     |       | 1 | 2.086706 | 2        | 12.7 |
| 581  | m | 66.36986 |       | 1 | 2.084607 | 9.421348 | -13  |
| 426  | F | 63.40548 |       | 1 | 2.083912 | 1.014527 | 0    |
| 273  | F | 77.72603 | ##### | 0 | 2.069204 | 22.26516 | 8    |
| 1069 | m | 68.7     |       | 1 | 2.068561 | 7        | -2.5 |
| 437  | m | 58.58356 |       | 1 | 2.058807 | 1.019764 | 4    |
| 584  | m | 52.51507 |       | 1 | 2.054057 | 15.21294 | -6   |
| 89   | m | 53.72603 | ##### | 1 | 2.053994 | 14.65413 | -21  |
| 1083 | m | 61.6     |       | 1 | 2.035981 | 25       | 0.0  |
| 530  | F | 77.45205 |       | 1 | 1.99345  | 3.1848   | 2    |
| 668  | m | 64.80548 |       | 1 | 1.988522 | 1.317188 | 6    |
| 884  | m | 83.30137 |       | 1 | 1.982237 | 0.285745 | 2    |
| 276  | m | 67.75616 | ##### | 1 | 1.97648  | 17.28347 | 29   |
| 1070 | F | 68.3     |       | 0 | 1.973358 | 9        | 2.9  |
| 42   | m | 76.74247 | ##### | 0 | 1.96847  | 56.93857 | -6   |
| 347  | m | 90.90959 |       | 1 | 1.966769 | 7.843063 | -26  |
| 594  | m | 50.90137 |       | 0 | 1.960904 | 13.72821 | -5   |
| 410  | m | 75.42192 |       | 0 | 1.95088  | 1.237848 | 0    |
| 1088 | m | 70.6     |       | 1 | 1.939251 | 6        | 0.0  |
| 1080 | m | 67.0     |       | 1 | 1.939167 | 4        | 22.9 |
| 634  | F | 71.77808 |       | 1 | 1.919469 | 14.7893  | 2    |
| 579  | m | 77.36438 |       | 1 | 1.915316 | 2.152426 | 8    |
| 1075 | m | 62.4     |       | 1 | 1.913802 | 1        | 18.9 |
| 447  | F | 66.17534 |       | 1 | 1.902768 | 1.014652 | 14   |
| 38   | m | 70.33699 | ##### | 1 | 1.894641 | 7.454091 | -56  |
| 16   | m | 81.26575 |       | 1 | 1.87785  | 1.01527  | 8    |
| 842  | F | 72.29315 |       | 0 | 1.874617 | 11.00272 | 0    |
| 784  | m | 70.1589  |       | 1 | 1.874497 | 0.318485 | -19  |
| 357  | m | 67.7589  |       | 1 | 1.866663 | 7.252246 | 25   |

|      |   |          |       |   |          |          |      |
|------|---|----------|-------|---|----------|----------|------|
| 284  | F | 54.01918 |       | 1 | 1.865765 | 1.547843 | 0    |
| 516  | m | 67.41918 |       | 0 | 1.852913 | 19.56498 | 16   |
| 54   | F | 67.8137  |       | 1 | 1.846479 | 4.021921 | 9    |
| 149  | m | 57.46301 |       | 1 | 1.844383 | 1.652702 | 16   |
| 522  | m | 48.92055 |       | 0 | 1.835945 | 16.40284 | -5   |
| 1053 | m | 71.5     |       | 1 | 1.834594 | 3        | 12.9 |
| 397  | F | 61.20274 |       | 1 | 1.830209 | 7.25116  | 9    |
| 438  | F | 84.2     |       | 1 | 1.823673 | 0.220301 | 4    |
| 1086 | m | 55.1     |       | 1 | 1.81643  | 25       | 0.1  |
| 481  | F | 62.51781 |       | 1 | 1.811177 | 1.352113 | 13   |
| 572  | m | 81.10411 |       | 1 | 1.809264 | 6.187765 | 449  |
| 592  | m | 68.19726 |       | 1 | 1.806985 | 8.186711 | 1    |
| 57   | m | 68.00822 | ##### | 0 | 1.801267 | 0.007592 | -19  |
| 566  | m | 46.9863  |       | 0 | 1.801097 | 51.27452 | 0    |
| 598  | F | 85.70411 |       | 1 | 1.779498 | 1.780071 | -7   |
| 686  | m | 79.97808 |       | 0 | 1.778845 | 3.502365 | 46   |
| 499  | F | 74.41918 |       | 1 | 1.77428  | 2.317015 | 8    |
| 627  | m | 85.32603 |       | 1 | 1.756136 | 0.552728 | -1   |
| 353  | m | 65.84932 |       | 1 | 1.754417 | 41.54626 | 118  |
| 348  | m | 75.21096 |       | 1 | 1.74888  | 12.58723 | -7   |
| 448  | m | 55.78904 |       | 0 | 1.738385 | 48.30224 | 57   |
| 473  | m | 69.85479 |       | 0 | 1.73698  | 16.80183 | 164  |
| 508  | F | 79.06027 |       | 1 | 1.735869 | 2.480983 | 12   |
| 292  | F | 62.47397 |       | 0 | 1.729846 | 22.07205 |      |
| 1073 | F | 67.8     |       | 1 | 1.729844 | 8        | 17.5 |
| 616  | F | 67.61918 |       | 0 | 1.7273   | 19.64438 | 22   |
| 460  | m | 81.99726 |       | 1 | 1.725599 | 7.654714 | 7    |
| 422  | m | 70.2     |       | 1 | 1.72481  | 2.619372 | 0    |
| 387  | m | 67.31233 |       | 1 | 1.7149   | 18.03978 | 0    |
| 193  | m | 83.16986 | ##### | 0 | 1.696572 | 12.57035 | -11  |
| 293  | F | 69.00822 |       | 1 | 1.696425 | 26.58603 | -21  |
| 618  | m | 70.0411  |       | 1 | 1.690958 | 0.520011 |      |
| 639  | F | 83.73425 |       | 1 | 1.689295 | 2.850287 | 35   |
| 494  | F | 67.84658 |       | 1 | 1.675668 | 53.75171 | -9   |
| 553  | m | 68.29589 |       | 1 | 1.670349 | 15.52206 | -17  |
| 241  | F | 65.88493 |       | 1 | 1.667716 | 6.682867 | 5    |
| 52   | m | 71.39178 |       | 1 | 1.666159 | 18.31889 | 3    |
| 554  | F | 66.51233 |       | 1 | 1.665102 | 21.48327 | 57   |
| 1076 | m | 71.7     |       | 1 | 1.662425 | 10       | 0.0  |
| 215  | m | 84.76986 |       | 0 | 1.657783 | 12.43893 | -11  |
| 535  | m | 55.47397 |       | 0 | 1.657443 | 33.16999 | -23  |
| 279  | m | 56.36986 | ##### | 1 | 1.652578 | 59.65583 |      |
| 390  | m | 59.19726 |       | 0 | 1.649151 | 5.449893 | 0    |
| 84   | m | 69.3863  | ##### | 0 | 1.637626 | 15.36102 | 15   |
| 526  | m | 59.42466 |       | 1 | 1.620158 | 41.18608 | 10   |
| 520  | m | 78.14247 |       | 1 | 1.608726 | 24.50468 | 0    |
| 88   | F | 60.6411  | ##### | 0 | 1.604849 | 42.24625 | 24   |
| 194  | F | 67.85753 |       | 1 | 1.604679 | 0.982943 | 17   |
| 250  | m | 77.2137  |       | 1 | 1.604256 | 1.776957 | 3    |
| 55   | m | 68.12329 |       | 1 | 1.603624 | 1.98601  | 0    |

|      |   |          |       |   |          |          |       |
|------|---|----------|-------|---|----------|----------|-------|
| 1040 | m | 81.1     |       | 1 | 1.598985 | 3        | -2.1  |
| 543  | m | 66.4274  |       | 1 | 1.59676  | 1.417546 | 52    |
| 531  | m | 72.24658 |       | 0 | 1.593235 | 74.67213 | -161  |
| 541  | m | 60.38904 |       | 1 | 1.565186 | 5.886944 | 9     |
| 261  | m | 67.71781 |       | 1 | 1.562943 | 4.742946 | -7    |
| 255  | m | 71.11233 | ##### | 1 | 1.558855 | 24.35631 | 4     |
| 219  | m | 49.23836 | ##### | 1 | 1.557556 | 37.70803 | 0     |
| 529  | F | 82.09863 |       | 1 | 1.55071  | 1.087941 | 3     |
| 364  | m | 58.25753 |       | 0 | 1.549093 | 6.496235 | 10    |
| 606  | F | 42.27397 |       | 0 | 1.531993 | 11.8673  | 0     |
| 977  | F | 58.17808 | ##### | 0 | 1.526308 | 45.93649 | -36   |
| 1032 | F | 70.2     |       | 1 | 1.524258 | 21       | -2.8  |
| 22   | m | 67.36438 | ##### | 1 | 1.517674 | 19.61925 | 0     |
| 1045 | m | 68.7     |       | 1 | 1.504928 | 15       | 4.8   |
| 192  | m | 63.9589  |       | 1 | 1.504887 | 23.153   | 549   |
| 571  | m | 88.1726  |       | 1 | 1.49887  | 2.250233 | 23    |
| 1062 | F | 29.9     |       | 1 | 1.497899 | 8        | 14.6  |
| 498  | m | 56.87397 |       | 1 | 1.493818 | 12.1843  | 0     |
| 712  | F | 59.20274 |       | 0 | 1.489566 | 0.598646 | -2    |
| 599  | F | 88.01918 |       | 1 | 1.482274 | 0.488579 | 13    |
| 415  | m | 78.8274  |       | 1 | 1.47797  | 4.184109 | 0     |
| 1066 | m | 58.3     |       | 1 | 1.473789 | 2        | -1.3  |
| 136  | F | 68.03562 |       | 1 | 1.469711 | 3.287539 | 0     |
| 1028 | m | 83.81644 |       | 1 | 1.468085 | 1.242334 | -13   |
| 444  | m | 77.86849 |       | 1 | 1.465832 | 14.51044 | 0     |
| 459  | m | 49.23562 |       | 1 | 1.459329 | 3.343428 | 0     |
| 892  | m | 52.13973 |       | 1 | 1.4536   | 0.43848  | 0     |
| 451  | m | 66.44932 |       | 0 | 1.453163 | 51.82508 | 5     |
| 435  | m | 75.54247 |       | 1 | 1.448446 | 3.651147 | 0     |
| 400  | m | 73.43836 |       | 1 | 1.438636 | 7.81563  | 1     |
| 424  | m | 73.69041 |       | 1 | 1.437958 | 2.02104  | 9     |
| 505  | m | 50.64384 |       | 1 | 1.429253 | 21.18783 | -8    |
| 555  | m | 63.99178 |       | 1 | 1.418164 | 19.12162 | 12    |
| 1048 | F | 65.1     |       | 1 | 1.41519  | 1        | 9.8   |
| 104  | m | 65.08493 |       | 1 | 1.415139 | 11.78576 | 0     |
| 538  | F | 59.65753 |       | 0 | 1.414258 | 2.83987  | 27    |
| 602  | F | 66.93699 |       | 1 | 1.41223  | 14.35466 | 12    |
| 1044 | F | 77.3     |       | 1 | 1.407835 | 6        | -10.5 |
| 306  | m | 74.94795 |       | 1 | 1.407482 | 0.183467 | -1    |
| 829  | m | 52.17534 |       | 0 | 1.406511 | 0.036948 | 0     |
| 152  | m | 66.66301 | ##### | 0 | 1.401997 | 8.664805 | -14   |
| 1042 | F | 45.5     |       | 1 | 1.400903 | 2        | 0.0   |
| 716  | F | 75.49863 |       | 1 | 1.39612  | 0.618816 | 12    |
| 1047 | F | 68.3     |       | 1 | 1.390235 | 13       | 0.0   |
| 251  | m | 81.93699 | ##### | 1 | 1.384937 | 22.9877  | -6    |
| 209  | m | 78.57534 |       | 1 | 1.38189  | 10.85534 | -61   |
| 458  | F | 71.90959 |       | 1 | 1.377955 | 1.238704 | -26   |
| 490  | F | 46.24384 |       | 1 | 1.377776 | 3.220721 | 5     |
| 993  | m | 80.36164 | ##### | 0 | 1.377294 | 45.73271 | 106   |
| 5    | F | 58.07671 |       | 0 | 1.375021 | 65.5717  | 5     |

|      |   |          |       |   |          |          |      |
|------|---|----------|-------|---|----------|----------|------|
| 338  | F | 80.90959 |       | 0 | 1.374475 | 8.010217 | 23   |
| 1055 | F | 74.0     |       | 1 | 1.372152 | 18       | 14.5 |
| 334  | F | 43.14247 |       | 1 | 1.37057  | 5.750916 | -30  |
| 563  | F | 70.09589 |       | 1 | 1.368196 | 9.314244 | 6    |
| 1033 | m | 62.6     |       | 1 | 1.36173  | 1        | -5.8 |
| 399  | m | 94.78356 |       | 1 | 1.358432 | 5.544079 | -383 |
| 940  | m | 68.46849 | ##### | 0 | 1.355745 | 68.33709 | -34  |
| 955  | m | 69.22466 | ##### | 0 | 1.342878 | 76.76687 | 0    |
| 1072 | m | 72.8     |       | 1 | 1.335506 | 10       | 18.6 |
| 161  | F | 73.15616 |       | 1 | 1.332218 | 0.980285 | 13   |
| 46   | m | 82.73425 |       | 1 | 1.315812 | 14.1841  | 33   |
| 97   | F | 70.02466 |       | 1 | 1.312358 | 4.313929 | 24   |
| 979  | m | 45.72055 | ##### | 0 | 1.309372 | 28.60019 | 19   |
| 238  | F | 47.76712 | ##### | 1 | 1.305926 | 42.95195 | 0    |
| 224  | m | 70.10411 | ##### | 1 | 1.304549 | 20.81686 | 127  |
| 205  | F | 75.15616 |       | 1 | 1.303408 | 18.98746 | -10  |
| 191  | m | 57.70685 |       | 1 | 1.296325 | 27.81728 | 58   |
| 212  | m | 68.43288 | ##### | 1 | 1.291532 | 5.875234 | -15  |
| 621  | m | 61.9863  |       | 1 | 1.28659  | 6.715635 | 0    |
| 183  | m | 68.19452 |       | 1 | 1.286532 | 13.01792 | -25  |
| 47   | F | 70.09863 | ##### | 0 | 1.285959 | 23.42836 | -7   |
| 285  | F | 75.11507 |       | 1 | 1.284034 | 6.58314  | -63  |
| 517  | m | 71.81644 |       | 1 | 1.283287 | 10.37531 | 0    |
| 454  | F | 86.23288 |       | 1 | 1.2802   | 0.321371 | 27   |
| 151  | m | 79.2     |       | 0 | 1.279107 | 0.236866 | 0    |
| 23   | F | 85.03836 | ##### | 1 | 1.272368 | 21.05198 | -70  |
| 325  | m | 71.72603 |       | 1 | 1.272112 | 0.6538   | 3    |
| 314  | m | 69.30685 |       | 0 | 1.266942 | 3.2345   | 0    |
| 159  | m | 75.70959 | ##### | 1 | 1.266865 | 2.946671 | -37  |
| 391  | m | 67.46849 |       | 1 | 1.266593 | 4.751101 | 0    |
| 1068 | F | 81.3     |       | 1 | 1.263885 | 4        | 17.1 |
| 368  | F | 74.57808 |       | 1 | 1.260618 | 9.454939 | 0    |
| 406  | m | 82.08219 |       | 1 | 1.256075 | 6.255605 | -2   |
| 510  | F | 59.92055 |       | 0 | 1.255485 | 43.60148 | 14   |
| 466  | m | 67.91507 |       | 0 | 1.254441 | 7.00196  | 2    |
| 254  | F | 72.2     | ##### | 1 | 1.253462 | 26.8169  | -216 |
| 851  | m | 71.72329 |       | 1 | 1.250771 | 0.372909 | 0    |
| 351  | F | 72.16438 |       | 1 | 1.246316 | 3.645224 | 7    |
| 1064 | F | 59.3     |       | 1 | 1.245839 | 11       | 0.0  |
| 20   | m | 61.09863 | ##### | 0 | 1.245408 | 2.399309 | -79  |
| 457  | m | 71.96164 | ##### | 1 | 1.244624 | 22.91379 | 5    |
| 479  | F | 63.85479 |       | 1 | 1.239077 | 25.38519 | 0    |
| 376  | F | 74.35068 |       | 1 | 1.238718 | 10.44745 | 5    |
| 184  | m | 75.55068 | ##### | 0 | 1.237917 | -0.76041 | -25  |
| 50   | m | 78.88767 |       | 1 | 1.23503  | 30.31808 | 188  |
| 135  | m | 76.01644 | ##### | 1 | 1.22889  | 5.617072 | 1    |
| 64   | m | 80.89589 |       | 1 | 1.222858 | 10.31963 | -3   |
| 518  | m | 48.39452 |       | 0 | 1.220636 | 13.96559 | 0    |
| 540  | F | 44.09863 |       | 1 | 1.218555 | 9.386152 | 0    |
| 1054 | m | 66.8     |       | 1 | 1.217622 | 1        | 13.7 |



|      |   |          |       |   |          |          |       |
|------|---|----------|-------|---|----------|----------|-------|
| 340  | m | 65.74521 |       | 1 | 1.214279 | 18.45058 | 19    |
| 268  | m | 53.0137  | ##### | 1 | 1.214004 | 48.28417 | 12    |
| 548  | F | 69.23836 |       | 0 | 1.212351 | 6.599464 | 18    |
| 233  | F | 75.67945 |       | 0 | 1.212015 | 6.806477 |       |
| 825  | m | 61.98356 |       | 1 | 1.205494 | 11.08421 | -6    |
| 99   | F | 74.07671 |       | 1 | 1.20276  | 16.52272 | 28    |
| 416  | F | 78.0137  |       | 0 | 1.197783 | 0.559055 | -9    |
| 283  | F | 64.50959 | ##### | 1 | 1.19486  | 2.451802 | 35    |
| 495  | m | 71.27123 |       | 1 | 1.190636 | 2.213033 | 0     |
| 1034 | F | 40.9     |       | 0 | 1.189946 | 12       | -0.2  |
| 367  | m | 68.63836 |       | 1 | 1.183806 | 6.356192 | -21   |
| 51   | F | 83.00274 | ##### | 1 | 1.177025 | 2.018261 | 53    |
| 361  | F | 74.62192 |       | 1 | 1.174176 | 5.44804  | 30    |
| 271  | m | 74.41096 |       | 1 | 1.170085 | 4.184645 | 0     |
| 315  | F | 80.72055 |       | 1 | 1.168009 | 4.319045 | 4     |
| 427  | m | 76.13425 |       | 1 | 1.166924 | 3.08596  | 22    |
| 620  | m | 85.13151 |       | 1 | 1.163423 | 1.180753 | 8     |
| 1035 | m | 70.8     |       | 1 | 1.16222  | 0        | 14.6  |
| 320  | F | 83.02192 |       | 1 | 1.161679 | 1.776431 | 4     |
| 443  | m | 77.25753 |       | 1 | 1.160003 | 10.34869 | -34   |
| 497  | m | 44.85753 |       | 0 | 1.158352 | 2.221825 | 0     |
| 263  | m | 40.03014 |       | 0 | 1.156645 | 2.059224 | 0     |
| 48   | F | 71.59726 |       | 1 | 1.153652 | 0.921059 | 3     |
| 117  | F | 51.48219 |       | 0 | 1.152781 | 74.89902 | -484  |
| 402  | F | 79.46849 |       | 1 | 1.152184 | 7.308244 | -27   |
| 203  | m | 78.15616 |       | 1 | 1.151689 | 34.95155 | 377   |
| 793  | m | 81.3863  |       | 1 | 1.151209 | 0.286295 | -7    |
| 358  | F | 71.26301 |       | 0 | 1.149463 | 2.728856 | 1     |
| 405  | m | 79.24658 |       | 1 | 1.141046 | 2.614733 | 1     |
| 463  | m | 60.58356 |       | 1 | 1.139397 | 6.954179 | 0     |
| 957  | F | 50.30959 | ##### | 0 | 1.138104 | 73.33176 | 11    |
| 277  | F | 88.87123 |       | 0 | 1.137204 | 9.741286 | -513  |
| 378  | m | 52.6274  |       | 1 | 1.135856 | 29.88179 | -799  |
| 1037 | m | 69.8     |       | 1 | 1.134411 | 0        | 4.1   |
| 419  | F | 67.88219 |       | 1 | 1.131447 | 5.154906 | 123   |
| 31   | m | 68.80274 |       | 1 | 1.131021 | 4.11518  | 42    |
| 269  | F | 64.34795 |       | 1 | 1.126993 | 4.352181 | 5     |
| 83   | m | 69.71781 |       | 1 | 1.126253 | 0.783755 | 0     |
| 1060 | F | 76.8     |       | 1 | 1.122816 | 26       | 17.6  |
| 408  | F | 66.78082 |       | 0 | 1.117347 | 1.065811 | -15   |
| 366  | m | 65.52329 |       | 0 | 1.109183 | 2.672619 | 38    |
| 379  | m | 48.90411 |       | 1 | 1.102403 | 8.349859 | 0     |
| 156  | m | 66.69041 |       | 1 | 1.09554  | 17.64936 | 5     |
| 186  | F | 76.99452 | ##### | 1 | 1.09538  | 12.18873 | -91   |
| 113  | F | 66.55068 |       | 0 | 1.094163 | 0.066155 | 0     |
| 86   | m | 68.02192 | ##### | 1 | 1.094155 | 3.518476 | 1     |
| 53   | m | 58.4     |       | 0 | 1.089969 | 74.99611 |       |
| 468  | m | 58.77808 |       | 1 | 1.086083 | 4.252026 | -30   |
| 295  | F | 55.06849 |       | 0 | 1.082888 | 60.83253 | -26   |
| 127  | m | 66.23014 |       | 0 | 1.080546 | 0.497888 | -2114 |

|      |   |          |       |   |          |          |      |
|------|---|----------|-------|---|----------|----------|------|
| 407  | m | 87.2411  |       | 1 | 1.078144 | 2.01935  | -18  |
| 145  | m | 60.59726 |       | 0 | 1.075884 | 65.56982 | 853  |
| 648  | F | 84.97808 |       | 1 | 1.07507  | 2.514638 | -8   |
| 488  | F | 44.34795 | ##### | 1 | 1.074117 | 24.1859  | -60  |
| 33   | F | 81.69315 |       | 1 | 1.073811 | 3.683704 | -13  |
| 196  | F | 57.36164 |       | 0 | 1.070508 | 2.869025 | 0    |
| 300  | F | 85.1726  |       | 1 | 1.066181 | 8.511327 | 23   |
| 546  | F | 71.41918 |       | 1 | 1.062    | 1.212538 | 5    |
| 356  | F | 58.66849 |       | 0 | 1.058496 | 2.400992 | 4    |
| 467  | F | 52.87123 |       | 1 | 1.051759 | 8.779729 | -1   |
| 128  | m | 63.44384 |       | 0 | 1.051726 | 24.97653 | -23  |
| 76   | F | 58.50411 |       | 0 | 1.051241 | 21.10422 | 17   |
| 281  | m | 64.86027 |       | 1 | 1.048713 | 56.35551 | -1   |
| 388  | F | 83.87123 |       | 1 | 1.048246 | 4.34996  | -18  |
| 318  | m | 77.22466 |       | 1 | 1.047828 | 16.04295 | 21   |
| 604  | m | 80.23562 |       | 1 | 1.047322 | 1.021509 | 23   |
| 503  | F | 63.30137 |       | 0 | 1.045473 | 27.76722 | 3    |
| 472  | m | 76.53425 |       | 1 | 1.044949 | 0.38328  | 0    |
| 948  | m | 55.03836 | ##### | 1 | 1.042305 | 62.08473 | 0    |
| 280  | F | 79.34521 | ##### | 1 | 1.040397 | 17.85005 | 133  |
| 139  | F | 62.40548 | ##### | 1 | 1.038582 | 21.75537 | 14   |
| 322  | m | 66.84384 |       | 1 | 1.03838  | 18.74849 | 6    |
| 58   | F | 66.71233 |       | 1 | 1.037368 | 6.776456 | 8    |
| 342  | F | 65.98356 |       | 1 | 1.037172 | 3.021187 | 54   |
| 417  | m | 78.07945 |       | 1 | 1.035834 | 9.187516 | -30  |
| 222  | F | 63.23836 |       | 1 | 1.032149 | 3.985475 | 89   |
| 1052 | F | 59.3     |       | 0 | 1.028698 | 13       | 0.0  |
| 525  | m | 41.73151 |       | 0 | 1.027321 | 66.07228 | -23  |
| 665  | F | 72.91781 | ##### | 0 | 1.026907 | 26.33946 | 17   |
| 87   | m | 60.48767 |       | 1 | 1.025807 | 10.02179 | 161  |
| 403  | m | 71.30959 |       | 1 | 1.024363 | 29.98572 | 0    |
| 1036 | m | 52.3     |       | 1 | 1.020035 | 15       | 0.0  |
| 1014 | m | 53.86301 | ##### | 0 | 1.019982 | 32.67167 | 37   |
| 125  | F | 70.65479 |       | 1 | 1.018638 | 28.04841 | -250 |
| 302  | F | 57.46301 |       | 1 | 1.017279 | 3.252615 | 11   |
| 493  | F | 65.72877 |       | 1 | 1.016113 | 3.754182 | -2   |
| 373  | m | 70.95342 |       | 0 | 1.016001 | 26.80771 | 20   |
| 384  | m | 73.50685 |       | 0 | 1.013426 | 32.83568 | 649  |
| 321  | m | 83.21644 |       | 1 | 1.009907 | 4.184905 | 5    |
| 1006 | m | 88.6137  |       | 1 | 1.00748  | 1.85419  | -23  |
| 557  | F | 62.61096 |       | 1 | 1.007461 | 1.482463 | 10   |
| 938  | m | 67.51233 |       | 1 | 1.004948 | 0.520245 | 13   |
| 6    | F | 56.44658 | ##### | 0 | 0.990518 | -1426.18 | -27  |
| 312  | F | 81.90685 |       | 1 | 0.989832 | 3.983393 | 0    |
| 350  | F | 59.68493 | ##### | 1 | 0.987544 | 3.886255 | 0    |
| 43   | m | 55.10959 |       | 1 | 0.985804 | 5.982794 | 19   |
| 968  | F | 68.12329 |       | 0 | 0.984492 | 65.3029  | -198 |
| 309  | m | 76.41644 |       | 1 | 0.981776 | 19.58442 | 5    |
| 171  | m | 72.68219 |       | 1 | 0.979595 | 20.28598 | 6    |
| 230  | m | 80.60548 | ##### | 1 | 0.979284 | 10.18824 | -34  |

|      |   |          |       |       |          |          |          |    |
|------|---|----------|-------|-------|----------|----------|----------|----|
| 217  | F | 80.95616 | ##### | 1     | 0.97824  | 4.748245 | 13       |    |
| 299  | m | 70.00274 | ##### | 0     | 0.977365 | 0.8706   | -31      |    |
| 1067 | m | 62.5     |       | 1     | 0.975104 | 12       | 24.5     |    |
| 431  | F | 61.69315 |       | 1     | 0.974841 | 8.083975 | 0        |    |
| 124  | m | 61.81918 |       | 1     | 0.974492 | 24.1529  | 7        |    |
| 909  | F | 29.80274 | ##### | 0     | 0.973115 | 17.3385  | -36      |    |
| 7    | m | 68.87123 |       | 1     | 0.968801 | 34.11678 | -67      |    |
| 257  | F | 46.69315 |       | 0     | 0.967951 | 70.47324 | 0        |    |
| 181  | F | 79.65753 | ##### | 0     | 0.962765 | 21.53857 | 14       |    |
| 11   | F | 56.39452 |       | 0     | 0.9621   | 1.618823 | 0        |    |
| 213  | m | 63.42192 |       | 1     | 0.961971 | 21.78755 | 14       |    |
| 93   | F | 62.6411  |       | 1     | 0.961357 | 5.216136 | 4        |    |
| 1065 | m | 72.8     |       | 1     | 0.960982 | 5        | 0.0      |    |
| 382  | F | 77.12329 |       | 1     | 0.954345 | 22.8808  | 0        |    |
| 519  | m | 76.66849 |       | 1     | 0.951573 | 0.418378 | 0        |    |
| 742  | F | 70.32877 |       | 1     | 0.950174 | 7.120232 | -653     |    |
| 1049 | F | 50.7     |       | 0     | 0.949859 | 8        | 10.6     |    |
| 28   | F | 83.53699 |       | 1     | 0.94928  | 7.253572 | 109      |    |
| 486  | F | 75.49315 |       | 1     | 0.94922  | 1.652944 | 0        |    |
| 81   | m | 76.71507 | ##### | 1     | 0.947745 | 15.11228 | 0        |    |
| 272  | F | 66.48767 | ##### | ##### | 0        | 0.945443 | 15.23588 | 15 |
| 420  | m | 79.61096 |       | 1     | 0.943472 | 16.15018 | 5        |    |
| 489  | m | 54.36986 |       | 0     | 0.942749 | 21.50771 | 78       |    |
| 450  | F | 25.97534 |       | 1     | 0.937297 | 16.62173 | -7       |    |
| 275  | m | 68.7589  |       | 0     | 0.937049 | 0.761302 | -28      |    |
| 10   | F | 69.93973 |       | 1     | 0.93389  | 7.852828 | -3       |    |
| 121  | m | 58.51507 |       | 0     | 0.927532 | 2.03345  | 9        |    |
| 12   | m | 65.71781 |       | 1     | 0.922344 | 3.838252 | 0        |    |
| 231  | m | 68.65205 | ##### | 0     | 0.918039 | 10.77558 | 12       |    |
| 1050 | m | 80.5     |       | 1     | 0.916746 | 1        | -1.5     |    |
| 120  | F | 65.89863 |       | 0     | 0.914604 | 0.038352 | 0        |    |
| 326  | m | 69.43288 |       | 1     | 0.913636 | 21.98362 | -10      |    |
| 208  | m | 70.27123 | ##### | 0     | 0.910377 | 59.37157 | 0        |    |
| 475  | F | 51.91781 | ##### | 1     | 0.908598 | 30.97992 | 0        |    |
| 507  | F | 62.75068 |       | 1     | 0.905196 | 3.948718 | -26      |    |
| 958  | F | 73.2274  |       | 0     | 0.904572 | 40.00653 | 455      |    |
| 111  | m | 70.38904 |       | 1     | 0.902694 | 14.82023 | 1        |    |
| 1046 | m | 70.2     |       | 1     | 0.900353 | 2        | 3.5      |    |
| 154  | F | 58       |       | 1     | 0.89753  | 6.352104 | 0        |    |
| 70   | m | 69.31781 | ##### | 1     | 0.89357  | 3.920696 | 5        |    |
| 297  | F | 85.67123 |       | 1     | 0.892972 | 14.98482 | -524     |    |
| 1057 | F | 63.1     |       | 0     | 0.892243 | 82       | 3.5      |    |
| 386  | F | 69.67123 |       | 1     | 0.892188 | 22.97703 | 27       |    |
| 1041 | F | 63.1     |       | 1     | 0.891904 | 8        | 1.0      |    |
| 294  | m | 81.5863  | ##### | 0     | 0.891281 | 24.96186 | 13       |    |
| 98   | F | 66.49589 | ##### | 0     | 0.891212 | -0.50021 | -25      |    |
| 445  | F | 74.23288 |       | 1     | 0.890572 | 2.18986  | 10       |    |
| 369  | F | 51.90685 |       | 1     | 0.889769 | 4.351304 | 14       |    |
| 926  | m | 33.10959 |       | 0     | 0.888908 | 0.074048 | 0        |    |
| 41   | F | 62.30411 |       | 1     | 0.888395 | 29.61017 | -112     |    |

|      |   |          |       |   |          |          |      |
|------|---|----------|-------|---|----------|----------|------|
| 370  | m | 86.52055 |       | 0 | 0.884939 | -8.20186 | 0    |
| 956  | m | 63.93973 | ##### | 0 | 0.883686 | 45.90156 | -49  |
| 945  | F | 50.05753 | ##### | 0 | 0.883487 | 17.70148 | 1    |
| 307  | m | 66.83014 | ##### | 0 | 0.881927 | 48.07681 | 9    |
| 201  | m | 70.64932 |       | 0 | 0.880356 | 45.27188 | -4   |
| 343  | m | 77.4411  |       | 1 | 0.879646 | 13.38842 | 4    |
| 221  | m | 70.55616 |       | 0 | 0.878721 | 20.87615 | 26   |
| 102  | F | 82.97534 | ##### | 0 | 0.87775  | 2.464246 | 3    |
| 185  | m | 80.99726 |       | 1 | 0.877562 | 27.4186  | 117  |
| 1010 | F | 73.86849 |       | 0 | 0.87488  | 51.73983 | 0    |
| 644  | F | 47.06027 |       | 0 | 0.87388  | 0.066222 | 0    |
| 1056 | F | 75.0     |       | 0 | 0.872801 | 11       | 0.0  |
| 289  | m | 51.03014 | ##### | 1 | 0.872194 | 20.08933 | 361  |
| 339  | F | 62.65753 |       | 1 | 0.871297 | 10.05445 | 0    |
| 155  | m | 69.10411 | ##### | 1 | 0.870512 | 19.71876 | 5    |
| 100  | F | 66.70685 | ##### | 1 | 0.870042 | 38.18582 | 14   |
| 336  | F | 59.73425 |       | 0 | 0.868006 | 1.500775 | -6   |
| 270  | m | 67.34247 |       | 0 | 0.867415 | 4.22469  | 0    |
| 45   | F | 84.44658 |       | 0 | 0.867326 | 5.232085 | 0    |
| 383  | F | 44.74795 |       | 1 | 0.86618  | 16.48323 | -1   |
| 214  | m | 73.09863 |       | 1 | 0.865965 | 31.41631 | 20   |
| 291  | F | 76.46575 |       | 1 | 0.860838 | 46.68432 | 17   |
| 32   | F | 73.90137 | ##### | 1 | 0.858694 | 30.97775 | -25  |
| 1038 | m | 74.3     |       | 1 | 0.85634  | 4        | 6.0  |
| 49   | m | 77.99452 | ##### | 1 | 0.855258 | 9.651367 | 11   |
| 138  | m | 83.73699 |       | 0 | 0.854268 | 8.72795  | -41  |
| 317  | F | 62.09589 |       | 0 | 0.852299 | 17.06984 | -27  |
| 114  | m | 80.66575 | ##### | 0 | 0.849982 | 73.76588 | 501  |
| 1039 | F | 57.6     |       | 1 | 0.849435 | 2        | 2.9  |
| 180  | F | 83.20548 |       | 0 | 0.849363 | 27.80286 | -45  |
| 131  | F | 91.92329 | ##### | 1 | 0.841686 | 4.14591  | 63   |
| 229  | F | 67.07671 |       | 1 | 0.841163 | 43.25546 | -7   |
| 187  | m | 58.80274 |       | 1 | 0.838978 | 9.518354 | 43   |
| 327  | m | 66.32055 |       | 1 | 0.836194 | 8.411334 | 9    |
| 216  | m | 86.89315 | ##### | 0 | 0.835398 | 1.67086  | -31  |
| 304  | F | 73.95068 |       | 1 | 0.834867 | 2.584357 | 19   |
| 502  | m | 68.9589  |       | 0 | 0.834092 | 14.42975 | -19  |
| 969  | F | 65.67945 |       | 1 | 0.831092 | 58.71808 | -128 |
| 393  | m | 62.09589 |       | 1 | 0.830901 | 2.684297 | 54   |
| 260  | m | 71.0411  |       | 1 | 0.830199 | 7.984223 | 18   |
| 108  | m | 57.32877 | ##### | 0 | 0.829514 | 59.3718  | 0    |
| 513  | F | 73.49315 |       | 0 | 0.823564 | 31.77582 | 34   |
| 37   | F | 76.88219 |       | 1 | 0.822841 | 47.82205 | 14   |
| 328  | F | 61.03014 |       | 1 | 0.818985 | 10.37786 | -4   |
| 1074 | m | 48.5     |       | 1 | 0.818921 | 10       | 4.6  |
| 246  | F | 69.85479 |       | 1 | 0.818484 | 1.783829 | 1    |
| 779  | m | 81.61644 |       | 1 | 0.817289 | 0.643422 | -5   |
| 636  | m | 66.29863 |       | 1 | 0.817184 | 2.084003 | -432 |
| 952  | m | 61.50411 |       | 1 | 0.815564 | 38.4161  | 48   |
| 610  | F | 75.7589  |       | 1 | 0.810654 | 11.85511 | 0    |

|      |   |          |       |   |          |          |       |
|------|---|----------|-------|---|----------|----------|-------|
| 509  | m | 68.89863 |       | 1 | 0.808665 | 21.62065 | 1     |
| 244  | F | 68.92603 |       | 1 | 0.808636 | 6.810871 | 0     |
| 441  | m | 87.92055 |       | 1 | 0.808569 | 42.54816 | -31   |
| 234  | F | 76.52329 | ##### | 0 | 0.80837  | 39.90123 | -70   |
| 119  | F | 80.59178 |       | 1 | 0.805531 | 3.98469  | 1     |
| 611  | m | 60.96712 |       | 1 | 0.805467 | 8.749306 | 5     |
| 377  | m | 70.7863  |       | 0 | 0.804713 | 13.96514 | -410  |
| 998  | F | 62.5863  |       | 0 | 0.80214  | -20.8074 | -2506 |
| 228  | m | 73.50137 |       | 0 | 0.801001 | 19.66371 | 108   |
| 1051 | m | 50.4     |       | 1 | 0.800602 | 16       | -11.5 |
| 1111 | m | 82.1     |       | 1 | 0.798147 | 0        | -7.4  |
| 430  | m | 62.34795 |       | 0 | 0.796744 | 0.555585 | 0     |
| 675  | m | 66.47123 |       | 1 | 0.795358 | 6.92054  | 0     |
| 656  | m | 77.10137 |       | 1 | 0.794389 | 2.347893 | 21    |
| 63   | m | 62.31507 |       | 0 | 0.79404  | 72.79411 | 48    |
| 26   | m | 65.44932 |       | 1 | 0.788642 | 14.9168  | 15    |
| 496  | F | 74.41644 |       | 0 | 0.78755  | 74.50012 | 752   |
| 175  | m | 78.15342 |       | 0 | 0.786546 | 56.40188 | 2     |
| 290  | F | 62.27123 | ##### | 1 | 0.786522 | 4.912716 | 9     |
| 514  | m | 63.54795 |       | 1 | 0.785638 | 4.782379 | 4     |
| 947  | F | 17.1726  | ##### | 1 | 0.785016 | 70.95241 | 6     |
| 973  | F | 53.77808 |       | 1 | 0.78478  | 14.95282 | -10   |
| 91   | F | 83.35616 |       | 1 | 0.784099 | 15.68427 | -678  |
| 471  | F | 74.99726 |       | 1 | 0.782669 | 9.885244 | 31    |
| 150  | F | 74.87397 |       | 0 | 0.780682 | 8.708622 | -2    |
| 511  | m | 47.52877 |       | 0 | 0.777109 | 72.09676 | 234   |
| 1018 | m | 64.62466 | ##### | 0 | 0.776332 | 74.69882 | 191   |
| 80   | m | 88.59726 |       | 1 | 0.776056 | 16.9516  | -64   |
| 362  | m | 71.95068 |       | 1 | 0.775181 | 17.58652 | 0     |
| 653  | m | 97.13151 |       | 1 | 0.773847 | 5.280831 | -34   |
| 918  | F | 69.83014 | ##### | 0 | 0.77134  | -1.026   | 11    |
| 172  | F | 68.25205 | ##### | 1 | 0.770737 | 29.84854 | 7     |
| 774  | m | 83.20822 |       | 1 | 0.77008  | 1.185254 | 79    |
| 1000 | F | 43.60548 | ##### | 0 | 0.768785 | 73.93553 | -434  |
| 8    | m | 64.85753 | ##### | 0 | 0.768365 | 33.00046 | 101   |
| 232  | F | 64.84384 |       | 0 | 0.767364 | 24.57273 | 14    |
| 19   | F | 65.14521 | ##### | 0 | 0.76725  | 33.00335 | 7     |
| 286  | F | 79.53973 |       | 0 | 0.765733 | 64.40818 | -404  |
| 316  | F | 84.27671 |       | 1 | 0.763858 | 8.451267 | 19    |
| 189  | m | 61.55616 |       | 1 | 0.762    | 2.852734 | 0     |
| 162  | F | 74.12329 |       | 1 | 0.758454 | 24.61683 | 3     |
| 412  | m | 62.60548 |       | 0 | 0.757691 | 2.803588 | 38    |
| 1109 | m | 64.3     |       | 1 | 0.757634 | 4        | -0.4  |
| 941  | m | 57.40822 | ##### | 0 | 0.75338  | 69.53302 | -97   |
| 67   | m | 62.00548 |       | 1 | 0.752835 | 7.952204 | 38    |
| 199  | m | 55.06575 | ##### | 1 | 0.7501   | 8.555952 | -13   |
| 355  | m | 62.99178 |       | 0 | 0.746245 | 7.994814 | 6     |
| 249  | m | 82.16986 | ##### | 1 | 0.741282 | 2.417303 | 40    |
| 60   | F | 46.26575 |       | 0 | 0.740766 | 32.51219 | -42   |
| 1108 | m | 84.8     |       | 1 | 0.739206 | 11       | 13.9  |

|      |   |          |       |   |          |          |       |
|------|---|----------|-------|---|----------|----------|-------|
| 147  | m | 68.09589 |       | 0 | 0.739114 | 55.54187 | -15   |
| 96   | F | 69.06849 | ##### | 1 | 0.73909  | 44.08743 | -9    |
| 129  | m | 84.25479 |       | 1 | 0.739008 | 10.55597 | -13   |
| 29   | m | 71.87123 |       | 1 | 0.733515 | 6.783101 | 0     |
| 169  | m | 69.10411 |       | 1 | 0.731219 | 18.81591 | 74    |
| 1026 | m | 34.76986 |       | 0 | 0.726653 | 3.12473  | 6     |
| 143  | F | 83.66301 | ##### | 0 | 0.72454  | 14.00205 | -30   |
| 274  | m | 64.27397 | ##### | 1 | 0.723512 | 37.88928 | -49   |
| 210  | m | 45.76712 |       | 1 | 0.722257 | 51.81772 | 7     |
| 73   | m | 45.64384 |       | 0 | 0.722158 | -0.96076 | -8    |
| 931  | F | 40.37534 | ##### | 0 | 0.721549 | 60.67113 | 0     |
| 190  | F | 79.80548 |       | 1 | 0.719896 | 2.749392 | -8    |
| 247  | m | 71.64384 |       | 0 | 0.71868  | 73.76666 | 357   |
| 1117 | F | 50.9     |       | 1 | 0.715894 | 33       | 0.0   |
| 68   | m | 66.05753 |       | 1 | 0.714419 | 13.20928 | 14    |
| 371  | F | 67.56712 |       | 0 | 0.71338  | 24.79639 | 4     |
| 78   | F | 68.71233 |       | 1 | 0.712386 | 3.94689  | 12    |
| 591  | F | 65.62192 |       | 0 | 0.710511 | 22.99743 | -1    |
| 404  | m | 43.34795 |       | 0 | 0.710274 | 18.20838 | 13    |
| 116  | m | 61.02466 |       | 0 | 0.709493 | 71.69537 | -220  |
| 227  | F | 49.44658 |       | 1 | 0.708133 | 8.782321 | 0     |
| 235  | m | 81.58082 |       | 1 | 0.70655  | 25.45231 | 587   |
| 75   | m | 69.25205 |       | 0 | 0.706292 | 5.850976 | 12    |
| 15   | F | 60.23836 |       | 1 | 0.705886 | 2.783221 | 5     |
| 344  | m | 73.94795 |       | 1 | 0.70348  | 3.146587 | -5    |
| 34   | F | 76.54795 |       | 1 | 0.703147 | 4.949287 | 0     |
| 838  | m | 60.49589 |       | 1 | 0.702958 | 0.91254  | 15    |
| 753  | F | 31.58082 |       | 0 | 0.70092  | 0.066984 | 0     |
| 256  | m | 68.06849 | ##### | 0 | 0.697892 | 75.85925 | 7     |
| 915  | F | 89.33425 |       | 1 | 0.69583  | 14.8157  | 281   |
| 354  | m | 50.62466 |       | 0 | 0.695106 | 12.13278 | -120  |
| 62   | m | 74.3726  |       | 1 | 0.693899 | 2.78649  | 0     |
| 590  | F | 60.12603 |       | 1 | 0.689137 | 28.74275 | 55    |
| 179  | m | 76.37808 |       | 1 | 0.685781 | 56.38149 | -58   |
| 13   | m | 75.32877 |       | 1 | 0.685508 | 6.451537 | -31   |
| 421  | F | 57.87671 |       | 1 | 0.684895 | 8.216437 | 54    |
| 1116 | F | 73.0     |       | 1 | 0.683281 | 6        | 8.7   |
| 446  | F | 66.56164 |       | 1 | 0.682724 | 24.75341 | 1     |
| 319  | m | 69.00274 |       | 1 | 0.682656 | 11.75121 | 107   |
| 18   | F | 52.92329 | ##### | 1 | 0.682452 | 19.11961 | 0     |
| 236  | m | 81.43836 |       | 1 | 0.678439 | 16.61801 | 0     |
| 961  | F | 42.44384 | ##### | 0 | 0.678165 | 2.39392  | -72   |
| 211  | m | 57.06849 |       | 0 | 0.677928 | 70.00071 | 10    |
| 385  | m | 47.24932 |       | 0 | 0.677869 | 71.85444 | -198  |
| 105  | m | 68.31507 |       | 0 | 0.677014 | 46.67069 | 6     |
| 112  | F | 64.15342 |       | 0 | 0.674216 | 11.80204 | 21    |
| 27   | F | 65.01644 |       | 1 | 0.674072 | 7.62155  | 18    |
| 984  | F | 55.72603 | ##### | 0 | 0.673966 | 49.93363 | -49   |
| 267  | m | 62.11233 |       | 0 | 0.672063 | 56.46873 | 0     |
| 570  | m | 64.49863 |       | 1 | 0.670234 | 1.316852 | -1082 |

|      |   |          |       |   |          |          |      |
|------|---|----------|-------|---|----------|----------|------|
| 1106 | m | 64.1     |       | 1 | 0.6683   | 2        | 0.0  |
| 110  | m | 70.1726  |       | 0 | 0.666623 | 29.6629  | 31   |
| 132  | m | 72.59452 |       | 0 | 0.666608 | 58.09285 | 537  |
| 123  | m | 82.5589  |       | 1 | 0.666587 | 0.649849 | 1    |
| 1118 | m | 70.9     |       | 1 | 0.666396 | 2        | 22.6 |
| 278  | F | 66.61918 |       | 0 | 0.665838 | 8.129629 | 25   |
| 1107 | m | 64.0     |       | 1 | 0.664598 | 6        | 0.0  |
| 103  | F | 73.46027 |       | 0 | 0.663919 | 58.30173 |      |
| 237  | m | 64.89315 |       | 1 | 0.662042 | 14.78343 | 7    |
| 964  | m | 66.4137  |       | 0 | 0.660593 | -36.1673 | -736 |
| 101  | F | 58.05205 |       | 1 | 0.659783 | 21.94719 | 31   |
| 313  | m | 50.42192 |       | 0 | 0.658122 | 70.76526 | 20   |
| 164  | F | 91.33151 | ##### | 0 | 0.653772 | 4.801081 | -16  |
| 705  | F | 82.76164 |       | 1 | 0.652597 | 8.885565 | 52   |
| 298  | F | 76.47397 |       | 1 | 0.651723 | 18.9178  | 42   |
| 137  | F | 55.5589  |       | 0 | 0.6517   | 52.53652 | -1   |
| 218  | F | 79.23836 |       | 1 | 0.65151  | 10.08679 | 261  |
| 265  | F | 78.66301 |       | 1 | 0.650327 | 15.84482 | 21   |
| 323  | m | 72.24384 |       | 1 | 0.649963 | 8.120506 | 26   |
| 1112 | m | 72.1     |       | 1 | 0.649321 | 11       | -2.2 |
| 930  | m | 42.55068 |       | 0 | 0.647203 | -1449.08 | 0    |
| 976  | F | 61.43288 | ##### | 0 | 0.646804 | 72.33324 | 64   |
| 173  | F | 69.86575 | ##### | 1 | 0.64572  | 6.115285 | 36   |
| 36   | m | 66.92055 |       | 0 | 0.644442 | 67.06459 | -621 |
| 148  | F | 78.25205 |       | 0 | 0.643742 | 73.36152 |      |
| 59   | F | 43.76986 | ##### | 0 | 0.643607 | 19.46605 | 3    |
| 394  | F | 78.12329 |       | 1 | 0.643105 | 1.055504 | -13  |
| 2    | m | 68.90959 |       | 1 | 0.642598 | 5.857181 | -11  |
| 14   | F | 57.24384 |       | 1 | 0.641879 | 26.51588 | -99  |
| 240  | m | 81.57808 |       | 0 | 0.640184 | 68.60103 | -394 |
| 492  | F | 65.38356 |       | 0 | 0.638915 | -0.06772 | 0    |
| 61   | m | 60.13425 |       | 1 | 0.637561 | 6.389744 | 48   |
| 1113 | m | 60.4     |       | 1 | 0.63616  | 15       | 0.4  |
| 4    | m | 78.6411  |       | 0 | 0.634581 | 69.99987 | 0    |
| 1002 | m | 68.00274 | ##### | 0 | 0.632768 | 72.09976 | -361 |
| 21   | F | 68.69041 |       | 1 | 0.632404 | 1.851609 | -68  |
| 936  | F | 76.32329 |       | 0 | 0.631378 | 70.20081 | -233 |
| 1115 | F | 66.5     |       | 1 | 0.63019  | 7        | 4.9  |
| 90   | F | 78.15068 |       | 1 | 0.629768 | 17.84754 | 12   |
| 745  | F | 69.47945 |       | 1 | 0.629736 | 3.583502 | -12  |
| 1009 | m | 79.92877 |       | 0 | 0.629096 | 3.469401 | 25   |
| 282  | m | 63.1863  | ##### | 1 | 0.628461 | 1.622857 | 7    |
| 414  | m | 68.43014 | ##### | 0 | 0.628208 | 42.63721 | 6    |
| 9    | m | 80.11781 |       | 0 | 0.62758  | 0.430864 | 22   |
| 65   | F | 79.13425 | ##### | 0 | 0.62635  | 10.93671 | -24  |
| 395  | m | 69.66849 |       | 1 | 0.625173 | 10.27704 | 0    |
| 375  | m | 61.75342 |       | 0 | 0.624639 | 28.10307 | -27  |
| 44   | F | 58.24384 |       | 1 | 0.620839 | 42.78346 | -3   |
| 225  | m | 78.03014 |       | 1 | 0.619745 | 6.049429 | 0    |
| 608  | F | 41.94521 |       | 0 | 0.617844 | 0.033308 | 0    |

|      |   |          |       |   |          |          |      |
|------|---|----------|-------|---|----------|----------|------|
| 717  | m | 66.99178 |       | 1 | 0.617383 | 22.78411 | -12  |
| 176  | F | 64.33151 |       | 0 | 0.617119 | 18.43053 | -20  |
| 411  | m | 69.86027 |       | 1 | 0.617005 | 6.180293 | 77   |
| 698  | F | 71.6     |       | 1 | 0.616923 | 18.28182 | 84   |
| 939  | F | 50.28767 |       | 0 | 0.614581 | 69.86224 |      |
| 1110 | F | 78.9     |       | 1 | 0.61379  | 6        | 12.9 |
| 188  | m | 52.20822 |       | 1 | 0.612125 | 5.151408 | 3    |
| 122  | m | 56.98082 |       | 1 | 0.60792  | 23.58373 | 0    |
| 372  | F | 72.10137 |       | 1 | 0.607505 | 4.381058 | 54   |
| 248  | m | 69.69589 |       | 0 | 0.607351 | 75.03897 | -268 |
| 140  | m | 69.11781 |       | 1 | 0.606732 | 0.914838 | 10   |
| 106  | m | 70.49315 | ##### | 0 | 0.605626 | 4.407887 | 10   |
| 480  | F | 77.08767 |       | 0 | 0.605293 | 2.402376 | 4    |
| 288  | F | 67.04658 |       | 0 | 0.604867 | 48.53838 | 35   |
| 3    | F | 68.5863  |       | 0 | 0.604076 | 1.715862 | 5    |
| 1114 | m | 75.2     |       | 1 | 0.602968 | 2        | 25.5 |
| 56   | m | 52.4274  |       | 0 | 0.601691 | 23.83475 | 22   |
| 476  | m | 53.76438 |       | 0 | 0.599271 | 3.291918 | 18   |
| 988  | m | 79.80548 |       | 1 | 0.596711 | 46.48704 | 3    |
| 850  | m | 82.3863  |       | 1 | 0.594915 | 8.554991 | 0    |
| 659  | m | 64.05753 |       | 1 | 0.592368 | 17.11634 |      |
| 903  | m | 64.84384 |       | 1 | 0.591297 | 9.053273 | 28   |
| 765  | F | 65.12055 |       | 1 | 0.590935 | 33.07452 | 6    |
| 999  | F | 81.96164 |       | 1 | 0.590607 | 3.313195 | 4    |
| 701  | F | 74.58904 |       | 1 | 0.59029  | 4.853368 | 1    |
| 739  | F | 79.2137  |       | 1 | 0.58886  | 1.254036 | -56  |
| 1021 | m | 61.91507 |       | 1 | 0.588629 | 12.14848 | 9    |
| 986  | m | 47.33425 | ##### | 0 | 0.587655 | 73.43537 | 23   |
| 569  | F | 87.89315 |       | 1 | 0.585501 | 0.553029 | -109 |
| 1011 | m | 52.20548 | ##### | 0 | 0.58405  | 64.87009 | 2    |
| 95   | m | 73.10411 | ##### | 0 | 0.581445 | 25.70208 | -61  |
| 1020 | m | 49.8     |       | 0 | 0.580819 | 2.293151 | -20  |
| 722  | m | 68.96438 |       | 1 | 0.580219 | 7.986775 | 30   |
| 933  | F | 65.45753 | ##### | 0 | 0.579754 | 8.440839 | 5    |
| 849  | m | 74.09315 |       | 1 | 0.579418 | 17.51744 | 0    |
| 1128 | F | 75.3     |       | 1 | 0.579036 | 6        | 15.8 |
| 24   | F | 49.92603 | ##### | 1 | 0.578213 | 15.74387 | 17   |
| 927  | m | 66.88493 |       | 0 | 0.576944 | 30.06877 | 5    |
| 897  | m | 51.70411 |       | 1 | 0.575447 | 12.51964 | 98   |
| 1137 | F | 44.8     |       | 1 | 0.574878 | 7        | 4.6  |
| 539  | F | 83.23288 |       | 1 | 0.574412 | 61.18233 | 0    |
| 882  | F | 51.10411 |       | 1 | 0.573532 | 21.45015 | -80  |
| 1150 | m | 65.8     |       | 1 | 0.572758 | 16       | 0.0  |
| 727  | F | 65.74795 |       | 1 | 0.570949 | 6.455209 | 0    |
| 826  | F | 79.44658 |       | 1 | 0.565929 | 4.719368 | 23   |
| 455  | F | 56.16986 | ##### | 0 | 0.564858 | 29.30799 | 17   |
| 142  | F | 70.09041 |       | 0 | 0.564005 | 62.99663 | -284 |
| 707  | F | 65.83288 |       | 0 | 0.564004 | 35.66443 | 5    |
| 134  | F | 64.01918 |       | 0 | 0.561753 | 77.20401 | 16   |
| 895  | m | 75.89041 |       | 0 | 0.559722 | 3.77302  | 21   |



|      |   |          |       |   |          |          |       |
|------|---|----------|-------|---|----------|----------|-------|
| 942  | m | 65.96438 |       | 1 | 0.559669 | 6.385645 | 495   |
| 207  | m | 72.56712 | ##### | 0 | 0.55964  | 17.96767 | -4    |
| 462  | m | 66.27945 |       | 1 | 0.55772  | 5.519281 |       |
| 487  | F | 67.02466 |       | 0 | 0.55746  | 21.03893 | 0     |
| 220  | F | 77.45753 | ##### | 0 | 0.556876 | 74.33183 | 1343  |
| 1146 | m | 64.9     |       | 1 | 0.55627  | 4        | 0.0   |
| 846  | m | 73.02466 |       | 1 | 0.55534  | 3.919528 | 3     |
| 1015 | m | 83.12603 |       | 1 | 0.554975 | 1.7542   | 6     |
| 168  | m | 68.07671 |       | 0 | 0.552378 | -1442.85 |       |
| 1151 | m | 68.4     |       | 1 | 0.551691 | 14       | 0.0   |
| 730  | F | 62.48767 |       | 1 | 0.551395 | 1.454512 | 6     |
| 768  | m | 79.20548 |       | 0 | 0.550889 | 5.696668 | 5     |
| 863  | F | 52.7726  |       | 0 | 0.550543 | 6.701726 | 48    |
| 449  | F | 78.53151 |       | 0 | 0.546996 | 2.033441 | 19    |
| 94   | F | 88.83014 |       | 1 | 0.546312 | 1.849029 | -2    |
| 682  | m | 71.02466 |       | 0 | 0.546162 | 74.87045 | 660   |
| 706  | F | 84.47123 |       | 1 | 0.543836 | 8.216471 | -8    |
| 365  | m | 69.30685 |       | 1 | 0.53909  | 32.10798 | 22    |
| 729  | m | 64.75342 |       | 1 | 0.537784 | 52.98193 | 203   |
| 35   | m | 76.72603 | ##### | 1 | 0.536434 | 10.3852  | 0     |
| 980  | m | 63.24384 | ##### | 0 | 0.536421 | 44.56912 | 36    |
| 167  | m | 79.46027 | ##### | 0 | 0.535214 | 7.330051 | 12    |
| 997  | F | 54.57808 | ##### | 0 | 0.535088 | 6.993063 | 0     |
| 469  | F | 70.10685 | ##### | 1 | 0.535063 | 17.61861 | -18   |
| 703  | m | 73.35616 |       | 1 | 0.533116 | 9.786505 | 27    |
| 943  | m | 52.79178 | ##### | 0 | 0.532281 | 69.06601 | -35   |
| 163  | F | 79.47671 |       | 0 | 0.531021 | 20.30349 | -999  |
| 146  | m | 76.03288 | ##### | 0 | 0.530771 | 6.802905 | -40   |
| 789  | m | 63.99726 |       | 1 | 0.530726 | 9.248743 | 26    |
| 824  | m | 81.09863 |       | 1 | 0.530569 | 18.58301 | 119   |
| 994  | m | 66.28219 |       | 0 | 0.530067 | 47.30187 | 0     |
| 440  | m | 63.53151 |       | 0 | 0.529748 | 0.001161 | -1921 |
| 814  | m | 70.88493 |       | 1 | 0.528479 | 1.014176 | 22    |
| 709  | F | 75.11781 |       | 0 | 0.527498 | 68.53915 | -174  |
| 757  | F | 60.52329 |       | 1 | 0.525034 | 12.81464 | 35    |
| 866  | m | 82.35068 |       | 1 | 0.524137 | 4.280272 | 90    |
| 144  | m | 76.76164 | ##### | 0 | 0.521635 | 63.4645  | -317  |
| 756  | F | 64.05753 |       | 0 | 0.520336 | 44.56164 | 7     |
| 157  | F | 68.55616 | ##### | 0 | 0.518158 | 19.83763 | 2     |
| 944  | F | 66.09589 |       | 1 | 0.518125 | 21.11411 | -29   |
| 812  | m | 57.74247 |       | 1 | 0.515681 | 23.84926 | 25    |
| 853  | m | 77.3726  |       | 1 | 0.5153   | 18.81573 | 4     |
| 776  | F | 60.92055 |       | 0 | 0.515039 | 1.730449 | 0     |
| 867  | m | 75.91507 |       | 0 | 0.514984 | 30.45382 | -1    |
| 226  | F | 40.23836 | ##### | 0 | 0.514054 | -1410.39 |       |
| 991  | m | 66.14247 |       | 0 | 0.513782 | 75.83435 | 1858  |
| 810  | F | 73.67397 |       | 1 | 0.513365 | 4.62121  | 21    |
| 910  | m | 44.21644 |       | 0 | 0.512185 | 71.29995 | 5     |
| 832  | F | 73.26301 |       | 1 | 0.512075 | 8.950691 | 23    |
| 1119 | F | 70.1     |       | 0 | 0.511948 | 83       | 20.5  |

|      |   |          |       |   |          |          |       |
|------|---|----------|-------|---|----------|----------|-------|
| 478  | F | 71.62192 |       | 0 | 0.510305 | 18.13376 | 0     |
| 650  | F | 81.39452 |       | 1 | 0.50917  | 6.952515 | -18   |
| 974  | F | 67.36164 |       | 0 | 0.508937 | 58.73023 | -79   |
| 719  | m | 55.86301 |       | 0 | 0.507819 | 2.010107 | -39   |
| 989  | F | 69.81918 |       | 0 | 0.507281 | 2.741379 | 10    |
| 770  | m | 84.08219 |       | 0 | 0.507107 | 2.7696   | 11    |
| 562  | F | 78.55342 |       | 0 | 0.50556  | 3.931482 | 60    |
| 1142 | m | 80.6     |       | 1 | 0.505096 | 19       | 0.7   |
| 1023 | m | 72.57534 |       | 1 | 0.504192 | 1.980601 | 4     |
| 1122 | m | 46.7     |       | 0 | 0.499734 | 35       | 9.6   |
| 946  | F | 84.73425 |       | 1 | 0.499045 | 0.585852 | -4    |
| 876  | m | 81.53425 |       | 1 | 0.498851 | 33.02207 | 28    |
| 741  | F | 75.93425 |       | 0 | 0.4982   | 45.30957 | 7     |
| 852  | m | 61.67671 |       | 1 | 0.497152 | 18.58771 | 7     |
| 970  | m | 47.06027 |       | 0 | 0.497076 | 73.66834 | 795   |
| 310  | m | 58.98356 |       | 0 | 0.496585 | 4.099873 | -6    |
| 1123 | F | 45.4     |       | 0 | 0.494574 | 29       | 0.0   |
| 967  | m | 60.74521 | ##### | 0 | 0.493799 | 62.93508 | 18    |
| 872  | F | 57.89863 |       | 0 | 0.493488 | 42.1676  | 12    |
| 688  | m | 64.24932 |       | 1 | 0.492668 | 57.91702 | 0     |
| 1149 | F | 67.9     |       | 1 | 0.48911  | 2        | 0.0   |
| 1124 | F | 66.4     |       | 1 | 0.487862 | 11       | 16.5  |
| 788  | F | 60.76438 |       | 1 | 0.487628 | 13.85162 | 19    |
| 692  | m | 81.98356 |       | 1 | 0.486635 | 17.94985 | 44    |
| 856  | F | 83.53699 |       | 1 | 0.48441  | 1.886743 | 0     |
| 177  | F | 61.92055 | ##### | 1 | 0.484222 | 27.97641 | 66    |
| 204  | F | 70.63562 |       | 1 | 0.484092 | 19.1524  |       |
| 921  | m | 70.63562 |       | 1 | 0.483595 | 19.52035 | 3     |
| 126  | m | 48.90137 | ##### | 0 | 0.483226 | 68.83028 | -1435 |
| 983  | m | 85.18904 |       | 1 | 0.479396 | 5.914308 | 41    |
| 264  | F | 71.17808 | ##### | 0 | 0.479094 | 34.56053 | -2    |
| 1022 | m | 43.11507 |       | 0 | 0.479063 | 10.76476 | 19    |
| 324  | F | 57.16712 |       | 1 | 0.47862  | 7.013389 | 15    |
| 1025 | F | 67.5863  |       | 1 | 0.478122 | 13.78443 | 88    |
| 778  | F | 67.43836 |       | 1 | 0.477371 | 5.380143 | 0     |
| 223  | F | 77.38356 | ##### | 0 | 0.476646 | 72.5343  | 32    |
| 71   | F | 80.04932 | ##### | 0 | 0.474633 | 30.47964 | -26   |
| 785  | m | 77.5726  |       | 0 | 0.473346 | 6.13114  | -19   |
| 1024 | F | 63.86027 |       | 1 | 0.47177  | 8.847575 | 0     |
| 830  | F | 46.28767 |       | 0 | 0.470216 | 36.56956 | 77    |
| 796  | F | 69.10685 | ##### | 0 | 0.47004  | 37.34296 | 5     |
| 760  | m | 80.58082 |       | 1 | 0.468638 | 12.81822 | 1     |
| 724  | F | 60.65753 |       | 0 | 0.468288 | 35.9363  | -7    |
| 732  | m | 82.29589 |       | 1 | 0.467506 | 7.157102 | 23    |
| 1121 | F | 68.3     |       | 1 | 0.466988 | 4        | 2.9   |
| 1008 | m | 66.69315 |       | 1 | 0.465232 | 21.12274 | -12   |
| 920  | m | 59.16164 |       | 0 | 0.4645   | 69.23978 | 27    |
| 987  | m | 69.76164 |       | 1 | 0.464288 | 31.81438 | 0     |
| 195  | m | 73.60822 |       | 1 | 0.464185 | 28.38255 | -26   |
| 1130 | F | 70.6     |       | 1 | 0.464055 | 1        | 0.0   |

|      |   |          |       |   |          |          |      |
|------|---|----------|-------|---|----------|----------|------|
| 305  | F | 67.33973 | ##### | 0 | 0.462932 | 18.68032 | 0    |
| 919  | m | 50.71233 | ##### | 0 | 0.462521 | 71.06632 | 19   |
| 995  | F | 70.53425 |       | 1 | 0.460241 | 16.18071 | 0    |
| 759  | m | 69.54247 |       | 1 | 0.458427 | 16.78628 | -1   |
| 780  | m | 70.26301 |       | 1 | 0.456071 | 3.486267 | 339  |
| 704  | m | 52.06849 |       | 0 | 0.455568 | 8.600658 | 4    |
| 924  | F | 88.26301 |       | 1 | 0.454891 | 2.887563 |      |
| 360  | m | 80.01644 |       | 1 | 0.453756 | 12.31863 | 3    |
| 799  | F | 67.57534 |       | 1 | 0.453189 | 10.51506 | 25   |
| 858  | F | 64.82192 |       | 1 | 0.451911 | 7.121306 | 1    |
| 848  | m | 62.89589 |       | 1 | 0.451249 | 2.117776 | 5    |
| 708  | m | 69.0274  |       | 1 | 0.45105  | 16.71838 | 33   |
| 474  | F | 93.10411 |       | 0 | 0.450724 | 1.39734  | 36   |
| 747  | m | 53.85479 |       | 1 | 0.448785 | 7.749037 | 0    |
| 1136 | F | 70.3     |       | 1 | 0.44805  | 12       | 7.8  |
| 833  | F | 69.70685 |       | 1 | 0.447077 | 66.40752 | 108  |
| 906  | m | 71.49589 |       | 0 | 0.446016 | 46.00938 | 1881 |
| 949  | m | 77.81096 |       | 1 | 0.44491  | 33.3733  | 392  |
| 734  | F | 83.01644 |       | 0 | 0.444279 | 7.636335 | 39   |
| 783  | m | 76.04384 |       | 0 | 0.44352  | 70.57574 | 0    |
| 916  | m | 70.47123 |       | 0 | 0.443365 | 54.86344 | -294 |
| 118  | m | 84.6137  | ##### | 1 | 0.443195 | 15.75352 | 12   |
| 907  | F | 79.0137  |       | 0 | 0.443191 | 72.67024 | 732  |
| 960  | m | 58.84658 |       | 1 | 0.438386 | 20.14869 | 44   |
| 937  | m | 58.92329 |       | 1 | 0.434856 | 13.64452 | -20  |
| 345  | m | 69.01644 |       | 1 | 0.434832 | 13.12297 | -13  |
| 470  | m | 73.30959 | ##### | 1 | 0.433215 | 16.48751 | -12  |
| 860  | F | 45.56712 |       | 1 | 0.431018 | 2.446298 | 44   |
| 1133 | m | 64.6     |       | 1 | 0.430018 | 2        | 25.8 |
| 878  | m | 46.5863  |       | 1 | 0.427962 | 27.35242 | -2   |
| 749  | F | 82.23562 |       | 1 | 0.427828 | 3.154463 | 7    |
| 887  | m | 67.98082 |       | 1 | 0.426042 | 2.48247  | 11   |
| 1120 | m | 73.8     |       | 1 | 0.425889 | 9        | 0.0  |
| 82   | F | 69.75616 | ##### | 1 | 0.423822 | 31.71331 | -18  |
| 835  | F | 60.68219 |       | 1 | 0.421073 | 22.08385 | 18   |
| 750  | F | 80.81918 |       | 1 | 0.420742 | 16.92055 | 5    |
| 702  | F | 44.40822 |       | 1 | 0.420165 | 18.07962 | 10   |
| 962  | m | 52.60548 | ##### | 0 | 0.418423 | 31.2717  | -2   |
| 1027 | F | 66.71507 |       | 1 | 0.417421 | 31.71709 | 2    |
| 512  | m | 40.49041 |       | 1 | 0.414719 | 9.385937 | 16   |
| 1153 | F | 42.8     |       | 1 | 0.414699 | 5        | 25.5 |
| 1029 | m | 47.39726 |       | 0 | 0.413754 | 63.23335 | 3    |
| 453  | F | 44.14795 | ##### | 0 | 0.413249 | 22.70926 | -8   |
| 74   | m | 72.06849 |       | 1 | 0.412405 | 31.48814 | -1   |
| 434  | m | 72.9726  |       | 1 | 0.41225  | 14.95363 | 17   |
| 436  | F | 60.74795 |       | 0 | 0.412142 | -1454.05 | 0    |
| 79   | m | 56.09315 | ##### | 0 | 0.411579 | 68.79714 |      |
| 914  | m | 80.45753 |       | 1 | 0.410287 | 12.51559 | 30   |
| 744  | F | 83.63288 |       | 1 | 0.410216 | 16.08663 | 18   |
| 30   | m | 64.89589 | ##### | 1 | 0.407344 | 21.87164 | 0    |

|      |   |          |       |   |          |          |      |
|------|---|----------|-------|---|----------|----------|------|
| 816  | m | 71.63562 |       | 1 | 0.406772 | 4.987722 | 6    |
| 791  | F | 77.72329 |       | 0 | 0.402064 | 64.02616 | 1376 |
| 740  | F | 76.96986 |       | 1 | 0.4017   | 49.98138 | 19   |
| 1019 | m | 71.57534 |       | 1 | 0.40142  | 13.11831 | 5    |
| 683  | m | 49.04658 |       | 0 | 0.401255 | 0.030134 | 0    |
| 864  | F | 69.27397 |       | 0 | 0.401219 | 74.01913 | -80  |
| 881  | F | 71.90685 |       | 1 | 0.400661 | 15.44442 | 33   |
| 828  | m | 65.69041 |       | 1 | 0.400471 | 13.98526 | 33   |
| 1134 | m | 73.2     |       | 1 | 0.400049 | 6        | 0.0  |
| 883  | F | 85.28493 |       | 0 | 0.399605 | 11.9715  | 1    |
| 752  | F | 78.84384 |       | 0 | 0.399564 | 28.36474 | 36   |
| 253  | F | 77.65205 | ##### | 0 | 0.399349 | 71.96551 | 567  |
| 303  | m | 55.09041 |       | 1 | 0.398007 | 20.35018 | 5    |
| 721  | m | 80.11507 |       | 1 | 0.395807 | 4.817257 | 11   |
| 252  | F | 71.59726 | ##### | 1 | 0.394359 | 50.4524  | -46  |
| 158  | m | 76.22466 | ##### | 0 | 0.392019 | 60.63581 | 310  |
| 928  | m | 19.73699 | ##### | 0 | 0.391497 | 34.29403 | 1    |
| 992  | m | 58.28493 |       | 1 | 0.386051 | 15.94771 | 0    |
| 913  | F | 62.28767 | ##### | 0 | 0.385304 | 49.0676  | 15   |
| 728  | F | 75.30959 |       | 1 | 0.385197 | 3.417334 | 28   |
| 891  | F | 67.20274 |       | 1 | 0.384181 | 2.956323 | -5   |
| 800  | m | 66.48767 |       | 1 | 0.382853 | 36.1466  | 8    |
| 870  | F | 66.70959 |       | 0 | 0.380825 | 19.77304 | 5    |
| 844  | m | 69.23288 |       | 1 | 0.379761 | 7.64945  | 0    |
| 1005 | m | 72.6     |       | 0 | 0.379423 | 62.02878 | -656 |
| 1131 | m | 69.0     |       | 0 | 0.377966 | 18       | 16.8 |
| 182  | m | 68.51233 |       | 0 | 0.37664  | 20.44023 | 0    |
| 819  | m | 69.09589 |       | 1 | 0.374816 | 32.01722 | 9    |
| 85   | F | 69.80274 |       | 0 | 0.374444 | 27.29791 | 4    |
| 242  | m | 51.73973 | ##### | 0 | 0.373286 | 73.4047  | -696 |
| 813  | m | 58.1863  |       | 0 | 0.373182 | 11.09923 | 4    |
| 1147 | m | 72.4     |       | 0 | 0.371785 | 6        | 0.0  |
| 77   | F | 65.12329 | ##### | 0 | 0.37122  | 36.34148 | -38  |
| 578  | F | 71.09041 |       | 1 | 0.370415 | 33.01862 | 0    |
| 726  | F | 45.51233 |       | 0 | 0.369699 | 10.01016 | 0    |
| 1004 | m | 51.65479 |       | 0 | 0.369208 | 21.46634 | 2    |
| 1129 | m | 71.8     |       | 1 | 0.368581 | 12       | 0.0  |
| 772  | F | 65.13151 |       | 0 | 0.368182 | 35.42077 | 6    |
| 1030 | F | 36.50411 |       | 1 | 0.367495 | 15.32203 | 9    |
| 714  | m | 78.34521 |       | 0 | 0.367126 | 38.77342 | -50  |
| 981  | F | 71.42192 |       | 1 | 0.365139 | 17.5814  | 5    |
| 831  | F | 60.64384 |       | 1 | 0.362051 | 9.849765 | 0    |
| 166  | F | 69.99726 | ##### | 1 | 0.361903 | 14.81292 | 12   |
| 311  | F | 74.64932 |       | 0 | 0.360666 | 0.042211 | 0    |
| 862  | F | 52.92603 |       | 0 | 0.360608 | 70.62719 | -353 |
| 715  | F | 51.6137  |       | 1 | 0.359544 | 17.05385 | 3    |
| 871  | F | 75.72055 |       | 1 | 0.357106 | 17.5222  | 0    |
| 854  | F | 77.15068 |       | 0 | 0.356396 | 4.204493 | -6   |
| 165  | m | 79.84384 |       | 0 | 0.355982 | -1484.85 | -227 |
| 971  | m | 71.09041 |       | 0 | 0.354594 | 73.70225 | -260 |

|      |   |          |       |   |          |          |       |
|------|---|----------|-------|---|----------|----------|-------|
| 1152 | m | 46.8     |       | 1 | 0.354586 | 8        | 0.0   |
| 978  | m | 70.67945 |       | 0 | 0.353186 | 8.40489  | 4     |
| 153  | m | 81.07945 | ##### | 1 | 0.352448 | 13.17478 | 0     |
| 1125 | m | 69.7     |       | 1 | 0.352202 | 12       | 0.0   |
| 917  | m | 70.44658 |       | 1 | 0.351761 | 12.48209 | -14   |
| 160  | m | 80.1863  | ##### | 1 | 0.350657 | 8.553253 | 0     |
| 773  | m | 61.85753 |       | 1 | 0.349868 | 11.04552 | 186   |
| 723  | F | 62.80548 |       | 0 | 0.348822 | 8.838108 | 46    |
| 821  | F | 69.84932 |       | 1 | 0.34864  | 18.27859 | 0     |
| 710  | F | 81.16164 |       | 1 | 0.3478   | 18.62204 | -7    |
| 1140 | F | 70.0     |       | 0 | 0.346927 | 4        | 15.5  |
| 950  | F | 53.30685 |       | 1 | 0.345701 | 9.121244 | -3    |
| 893  | m | 76.27671 |       | 1 | 0.344461 | 0.347238 | 3     |
| 805  | F | 77.48493 |       | 1 | 0.342643 | 10.78861 | 25    |
| 1013 | F | 71.93151 |       | 1 | 0.339288 | 13.18724 | 0     |
| 807  | m | 70.11233 |       | 1 | 0.338871 | 13.27609 | 0     |
| 308  | m | 53.41644 |       | 1 | 0.33799  | 13.8227  | 6     |
| 335  | F | 75.1726  |       | 0 | 0.336926 | 0.187428 | -251  |
| 836  | m | 53.8     |       | 1 | 0.336442 | 13.58535 | 0     |
| 720  | m | 63.88767 |       | 1 | 0.331802 | 10.55529 | 0     |
| 894  | m | 46.89041 |       | 0 | 0.330465 | 0.587713 | 0     |
| 787  | m | 66.51781 |       | 1 | 0.328856 | 10.71406 | 0     |
| 865  | m | 72.54795 |       | 1 | 0.328311 | 25.35388 | 0     |
| 1031 | F | 70.33151 |       | 1 | 0.328197 | 23.78343 | 103   |
| 775  | m | 66.1726  |       | 1 | 0.327188 | 9.185404 | 4     |
| 398  | m | 51.26027 |       | 1 | 0.326712 | 34.78833 | 0     |
| 1012 | F | 57.11781 |       | 1 | 0.326647 | 11.54587 | 0     |
| 331  | m | 71.52603 |       | 0 | 0.326268 | 0.059862 | -3049 |
| 170  | m | 69.41096 |       | 0 | 0.325969 | 15.89755 | -19   |
| 764  | m | 68.42466 |       | 1 | 0.325914 | 16.85307 | 2     |
| 766  | F | 62.71507 |       | 1 | 0.32542  | 27.78247 | 0     |
| 847  | m | 67.50411 |       | 1 | 0.325191 | 34.21472 | 6     |
| 985  | m | 74.47123 |       | 1 | 0.324989 | 8.45271  | 25    |
| 1141 | m | 70.9     |       | 0 | 0.324818 | 12       | 6.6   |
| 1016 | F | 66.70411 |       | 1 | 0.324818 | 7.989969 | 6     |
| 873  | m | 66.40822 |       | 1 | 0.323256 | 27.25084 | 0     |
| 797  | m | 65.99452 |       | 0 | 0.322728 | 37.53443 | 0     |
| 695  | m | 65.09863 |       | 0 | 0.322548 | 9.062882 | 6     |
| 771  | m | 71.16986 |       | 1 | 0.32026  | 4.120492 | 6     |
| 694  | m | 77.00822 |       | 1 | 0.319714 | 35.71223 | 162   |
| 879  | F | 66.09589 |       | 1 | 0.319629 | 16.1165  | 1     |
| 296  | F | 65.78082 | ##### | 1 | 0.317091 | 25.91905 | 14    |
| 711  | m | 72.82192 |       | 1 | 0.314327 | 7.053197 | 27    |
| 754  | m | 67.34247 |       | 0 | 0.314315 | 18.89901 | 0     |
| 911  | F | 60.75342 |       | 0 | 0.313881 | 64.83172 | -183  |
| 731  | F | 65.46027 |       | 0 | 0.313304 | 29.30077 | 7     |
| 925  | m | 57.01644 |       | 0 | 0.31228  | 51.82928 | 43    |
| 1132 | F | 55.8     |       | 1 | 0.31127  | 16       | 4.6   |
| 966  | F | 70.93699 |       | 0 | 0.310824 | 2.598449 | 26    |
| 972  | F | 68.96712 |       | 1 | 0.309055 | 1.384626 | -57   |

|      |   |          |       |   |          |          |       |
|------|---|----------|-------|---|----------|----------|-------|
| 699  | m | 68.20822 |       | 0 | 0.308134 | 9.729019 | 0     |
| 735  | F | 65.54795 |       | 0 | 0.307685 | 11.96605 | 8     |
| 804  | m | 37.08767 |       | 1 | 0.306489 | 14.58325 | 0     |
| 1003 | F | 65.69589 |       | 1 | 0.305885 | 11.82131 | 7     |
| 868  | F | 54.0411  |       | 0 | 0.304731 | 0.062848 | 0     |
| 381  | m | 67.07671 | ##### | 1 | 0.304387 | 15.67997 | -14   |
| 815  | m | 67.64932 |       | 0 | 0.302957 | 56.03902 | 78    |
| 857  | F | 75.64932 |       | 0 | 0.300829 | 6.877841 | 6     |
| 762  | F | 69.2137  |       | 1 | 0.299558 | 3.48021  | 16    |
| 990  | m | 60.86849 |       | 0 | 0.297945 | 15.30127 | -539  |
| 1001 | F | 58.53699 |       | 0 | 0.297767 | 13.79298 | -4    |
| 1127 | m | 76.8     |       | 1 | 0.29673  | 16       | 21.8  |
| 1138 | F | 70.7     |       | 1 | 0.295617 | 2        | 0.4   |
| 439  | F | 73.05205 | ##### | 1 | 0.295097 | 10.58463 | 2     |
| 820  | m | 76.73425 |       | 0 | 0.293196 | 2.969668 | 7     |
| 975  | F | 54.72329 |       | 1 | 0.29291  | 20.38371 | 0     |
| 738  | F | 67.76712 |       | 1 | 0.289231 | 21.41775 | 1     |
| 115  | m | 70.03288 |       | 0 | 0.288412 | 56.29927 | 7     |
| 40   | m | 69.58082 | ##### | 0 | 0.285947 | 1.701127 | 0     |
| 929  | m | 52.36164 |       | 0 | 0.284823 | 39.2743  | 0     |
| 200  | F | 58.66575 |       | 0 | 0.282644 | 50.86879 |       |
| 392  | m | 72.42192 |       | 1 | 0.282276 | 11.85021 | 0     |
| 781  | F | 63.42466 |       | 0 | 0.281581 | 6.328643 | 17    |
| 841  | m | 64.47123 |       | 1 | 0.280594 | 13.42041 | 19    |
| 605  | F | 71.73973 |       | 1 | 0.279774 | 11.77821 | -25   |
| 718  | m | 72.10137 |       | 0 | 0.279472 | 57.86176 | 1392  |
| 746  | m | 62.29589 |       | 0 | 0.279223 | 7.046236 | 3     |
| 901  | F | 91.09589 |       | 1 | 0.275154 | 4.044125 | -1448 |
| 1017 | m | 59.53425 |       | 0 | 0.274629 | 14.00308 | 22    |
| 827  | F | 37.61644 |       | 1 | 0.273889 | 42.68502 | 68    |
| 843  | F | 49.19726 |       | 1 | 0.27044  | 17.44149 | 0     |
| 839  | m | 70.09589 |       | 1 | 0.270241 | 45.85507 | 10    |
| 107  | F | 77.13699 | ##### | 0 | 0.269179 | 12.40614 | -4    |
| 748  | F | 69.67123 |       | 0 | 0.269074 | 66.37292 | 7     |
| 346  | m | 65.99178 | ##### | 1 | 0.268732 | 14.94192 | 32    |
| 859  | m | 65.19726 |       | 1 | 0.26607  | 43.951   | 0     |
| 689  | F | 73.81918 |       | 0 | 0.264752 | 0.192874 | 6     |
| 855  | F | 59.82192 |       | 0 | 0.263223 | 19.3688  | 6     |
| 875  | m | 65.5726  |       | 0 | 0.261082 | 76.08973 | 1309  |
| 823  | F | 65.48219 |       | 0 | 0.258472 | -1426.05 | 0     |
| 798  | F | 67.34521 |       | 1 | 0.25634  | 8.121901 | 105   |
| 811  | m | 60.99178 |       | 1 | 0.255943 | 24.64995 | 5     |
| 1144 | m | 67.2     |       | 1 | 0.25588  | 25       | 15.6  |
| 996  | m | 69.0274  |       | 0 | 0.255368 | 12.59456 | -27   |
| 904  | F | 68.86849 |       | 1 | 0.254668 | 7.613631 | 17    |
| 418  | m | 83.7863  |       | 1 | 0.253444 | 3.052376 | -30   |
| 794  | F | 72.85479 |       | 0 | 0.253422 | 55.73826 | -471  |
| 888  | F | 51.3726  |       | 0 | 0.253215 | 44.17061 | 26    |
| 482  | F | 71.38356 |       | 0 | 0.250594 | -0.19831 | -1412 |
| 767  | m | 74.56164 |       | 1 | 0.246949 | 28.92066 | 20    |

|      |   |          |       |   |          |          |      |
|------|---|----------|-------|---|----------|----------|------|
| 725  | F | 56.59452 |       | 1 | 0.243246 | 3.38458  | 7    |
| 259  | m | 73.89315 | ##### | 0 | 0.239789 | 27.30197 | 6    |
| 922  | m | 48.86575 |       | 1 | 0.238298 | 9.319317 | 1    |
| 845  | F | 78.70411 |       | 1 | 0.237909 | 1.218753 | -23  |
| 743  | m | 68.15342 |       | 1 | 0.235844 | 11.24658 | -4   |
| 1126 | F | 61.8     |       | 0 | 0.233916 | 12       | 26.5 |
| 959  | F | 76.71781 |       | 1 | 0.232356 | 37.35166 | 49   |
| 560  | F | 61.59726 |       | 0 | 0.227064 | 0.004534 | 0    |
| 733  | m | 78.79726 |       | 0 | 0.226691 | 29.89663 | 20   |
| 886  | m | 67.03014 |       | 0 | 0.225298 | 73.36805 | 399  |
| 755  | m | 78.39178 |       | 1 | 0.224461 | 10.98318 | 44   |
| 758  | m | 82.75616 |       | 0 | 0.222978 | 3.059761 | 47   |
| 817  | m | 60.6     |       | 0 | 0.222939 | 0.99822  | 0    |
| 877  | m | 72.52877 |       | 1 | 0.222841 | 45.6816  | 0    |
| 869  | F | 48.01096 |       | 1 | 0.222139 | 29.51446 | 1    |
| 1135 | F | 68.4     |       | 0 | 0.214318 | 6        | 5.8  |
| 953  | m | 75.80822 | ##### | 0 | 0.213793 | 21.79947 | 1    |
| 965  | m | 57.85753 | ##### | 0 | 0.211883 | 72.33405 | -82  |
| 954  | m | 56.26301 |       | 0 | 0.208746 | 2.0304   | 9    |
| 736  | m | 59.4411  |       | 1 | 0.208322 | 21.74859 | 11   |
| 790  | m | 57.04932 |       | 0 | 0.207845 | 44.80367 | 0    |
| 899  | m | 61.28219 |       | 0 | 0.204411 | 0.070538 | 0    |
| 262  | m | 67.42192 | ##### | 0 | 0.202153 | 10.00711 | -6   |
| 795  | F | 66.33151 |       | 1 | 0.201634 | 4.418953 | -38  |
| 751  | m | 84.47397 |       | 1 | 0.199038 | 18.5189  | 25   |
| 951  | m | 50.3863  |       | 0 | 0.198599 | 2.03141  | 13   |
| 834  | m | 47.55616 |       | 1 | 0.191041 | 16.14654 | 110  |
| 963  | F | 65.25753 |       | 1 | 0.190489 | 15.10766 | 326  |
| 429  | m | 76.07397 |       | 1 | 0.188186 | 14.41309 | 20   |
| 670  | m | 73.53699 |       | 0 | 0.184881 | 6.365249 | 1    |
| 861  | m | 61.81644 |       | 1 | 0.183728 | 25.51444 | 0    |
| 363  | m | 57.3863  | ##### | 1 | 0.176244 | 21.55047 | -29  |
| 982  | m | 79.69863 |       | 0 | 0.175783 | 4.971372 | 18   |
| 206  | m | 74.41918 | ##### | 1 | 0.172709 | 5.650256 | 5    |
| 1007 | m | 63.6411  |       | 1 | 0.168565 | 4.115676 | 60   |
| 889  | F | 66.8     |       | 0 | 0.157986 | 10.10341 | 25   |
| 700  | m | 62.51507 |       | 1 | 0.15684  | 24.24352 | 1664 |
| 885  | m | 51.70959 |       | 0 | 0.15566  | 7.488728 | 0    |
| 840  | F | 74.47123 |       | 1 | 0.148866 | 23.85281 | -441 |
| 1143 | m | 64.1     |       | 1 | 0.147092 | 7        | 0.0  |
| 792  | m | 67.81918 |       | 0 | 0.14402  | 11.46642 | 3    |
| 898  | m | 45.76164 | ##### | 0 | 0.141916 | 17.86851 | -28  |
| 1148 | m | 73.3     |       | 1 | 0.136361 | 4        | 7.9  |
| 802  | F | 78.1589  |       | 1 | 0.135391 | 3.089673 | -24  |
| 1145 | m | 48.8     |       | 0 | 0.133238 | 36       | 1.8  |
| 39   | m | 53.43288 | ##### | 1 | 0.13297  | 14.65559 | -28  |
| 890  | m | 71.94247 |       | 0 | 0.130644 | 1.369851 | 0    |
| 880  | m | 56.27945 |       | 0 | 0.12634  | 29.67031 | 2    |
| 923  | F | 51.52603 |       | 0 | 0.124573 | 0.991707 | 30   |
| 423  | F | 45.2     |       | 0 | 0.12284  | 0.030664 | 0    |

|      |   |          |       |   |          |          |     |
|------|---|----------|-------|---|----------|----------|-----|
| 902  | F | 56.69315 |       | 1 | 0.112772 | 9.816186 | 0   |
| 243  | F | 71.61096 | ##### | 1 | 0.108361 | 19.95271 | 6   |
| 809  | m | 67.54795 |       | 0 | 0.106225 | 14.77037 | 0   |
| 935  | m | 65.77534 |       | 1 | 0.076343 | 10.70979 | 10  |
| 900  | F | 75.61644 |       | 1 | 0.072178 | 21.64517 | 3   |
| 932  | m | 74.27123 |       | 0 | 0.06894  | -5.43059 | 51  |
| 1139 | m | 71.6     |       | 1 | 0.0642   | 4        | 6.9 |



|           | Days_fro  |          |
|-----------|-----------|----------|
|           | m_Visit_t |          |
| Weight_Fi | o_BMI_La  | Weight_L |
| rst       | st        | ast      |
| 60        | 244       | 53       |
| 60        | 9         | 60       |
| 61        | -32       | 61       |
| 50        | 505       | 30       |
| 78.6      | 91.7      | 70.8     |
| 98        | 322       | 95       |
| 73        | 1037      |          |
| 50        | 62        | 37       |
| 77.5      | 111.2     | 67.0     |
| 114       | 719       | 93       |
| 53        | 43        | 49       |
| 52.3      | 0.0       | 0.0      |
| 85        | 47        | 93       |
| 67        | -21       | 67       |
| 51        | 187       | 53       |
| 80        | 2         | 80       |
| 69.4      | 0.0       | 0.0      |
| 80        | 263       | 66       |
| 62        | 22        | 55       |
| 95        | 172       | 77       |
| 57.5      | 316       | 50       |
| 62.1      | 104.5     | 60.1     |
| 89        | 942       | 68       |
| 50        | 46        | 43       |
| 0.0       | 104.1     | 64.2     |
| 44        | -8        |          |
| 61        | 312       | 47       |
| 78        | 116       | 75       |
| 70        | 37        |          |
| 80        | 90        | 74       |
| 58        | 307       | 45       |
| 62        | 64        | 62       |
| 47        | 69        | 42       |
| 60        | 296       | 42       |
| 57.8      | 30        | 53.6     |
| 41        | 130       |          |
| 108       | 405       | 97       |
| 50        | -105      | 50       |
| 68        | 27        | 68       |
| 82        | -34       | 82       |
| 100       | 52        | 103      |
| 80        | 335       | 75       |
| 85.0      | 91.5      | 70.5     |
| 60        | 754       | 56       |
| 73        | 1082      | 78       |
| 90        | 0         | 90       |

|       |       |      |
|-------|-------|------|
| 70    | 224   | 59   |
| 69    | 74    | 61   |
| 78    | 51    | 81.8 |
| 62    | 85    | 57   |
| 72    | -839  | 72   |
| 68    | 1417  | 56   |
| 59.2  | 0.0   | 0.0  |
| 84    | 21    | 38.5 |
| 59    | 70    | 52   |
| 51    | 369   | 41   |
| 69    | -31   | 69   |
| 57    | -5    | 57   |
| 65    | 80    | 60.5 |
| 62.3  | 156   | 62.5 |
| 76    | 88    | 67   |
| 80.1  | 0.0   | 0.0  |
| 55    | -273  | 55   |
| 68.5  | 1324  |      |
| 45    | 91    | 42   |
| 95.9  | 0.0   | 0.0  |
| 68.2  | 98.6  | 58.4 |
| 106   | 92    | 105  |
| 106.1 | 151.1 | 93.9 |
| 73    | 116   | 77   |
| 62    | 113   | 52   |
|       | 209   | 68   |
| 68    | 261   | 63.5 |
| 65.9  | 0.0   | 0.0  |
| 41    | 359   | 65   |
| 85    | 5     | 85   |
| 50    | 202   | 40   |
| 61    | 331   | 55   |
| 73.8  | 1     | 73.8 |
| 70.2  | 92.8  | 80.6 |
| 83    | 233   | 63   |
| 51    | 46    |      |
|       | 183   | 62.8 |
| 68    | 1127  | 74   |
| 57.7  | 89    | 62   |
| 62.6  | 49    | 75   |
| 80    | 73    | 69   |
| 65    | 262   | 55   |
|       | 526   | 58   |
| 52    | 35    | 58   |
| 60    | 37    | 60   |
| 65    | 108   |      |
| 69    | 16    | 68   |
| 92    | 826   | 68   |
| 61    | 37    | 61   |
| 58    | 251   | 50   |

|       |       |      |
|-------|-------|------|
| 53.8  | 106.5 | 56.6 |
| 81    | 153   | 76   |
| 64.7  | 0.0   | 0.0  |
| 66    | 215   | 60   |
| 54.3  | 0.0   | 0.0  |
| 57    | 1281  | 55   |
| 67    | -68   | 67   |
| 67    | 28    | 63   |
| 90    | 74    | 85   |
| 97    | 6     | 97   |
| 83    | 23    | 79   |
| 59.5  | 27    | 59   |
| 66    | 236   |      |
| 60    | 118   | 47   |
| 80    | -1827 | 80   |
| 69.9  | 0.0   | 0.0  |
| 65    | -10   | 65   |
| 53    | 78    | 48   |
| 53    | 561   | 50   |
| 100   | 5     | 100  |
| 85    | 343   | 74   |
| 108   | 14    | 85   |
|       | 49    | 62   |
| 80    | 57    | 73.4 |
| 71    | -6    | 71   |
| 76.9  | 91.8  | 70.5 |
| 70.5  | 273   | 70   |
|       | 71    | 58   |
| 44    | 15    | 44   |
| 76.3  | 91.6  | 70.5 |
| 60.7  | 99.6  | 56.6 |
| 96.2  | 0.0   | 0.0  |
| 85    | 489   | 57   |
| 52.9  | 0.0   | 0.0  |
| 80    | 147   | 70   |
|       | 145   | 50   |
| 78    | 316   | 69   |
| 72    | 0     | 72   |
| 85    | 124   | 74   |
| 62.8  | 239   | 58   |
| 75    | 210   |      |
| 53    | 541   |      |
| 60    | 15    | 63   |
| 106.4 | 98.6  | 67.6 |
| 52.5  | 776   | 42   |
| 59.5  | 0.0   | 0.0  |
|       | -37   |      |
| 63    | 240   | 60   |
| 64    | 21    | 63   |

|      |       |      |
|------|-------|------|
| 50   | 293   | 62   |
| 65.7 | 418   | 53   |
| 64.7 | 0.0   | 0.0  |
| 83   | 430   | 69   |
| 42   | 11    | 42   |
| 76.5 | 417   | 47   |
| 54   | 1898  | 64   |
| 56   | 81    | 57   |
| 96.6 | 136   | 91   |
| 65   | 39    | 65   |
| 50   | 1785  | 48   |
| 74   | 15    | 73.5 |
| 73   | 15    | 73   |
| 65.0 | 93.1  | 36.4 |
| 90.5 | 801   | 77   |
| 64   | 1537  | 47   |
| 51   | 216   | 65   |
|      | 1318  | 72   |
| 80   | 7     | 80   |
| 68   | 135   | 65.4 |
| 54   | 1784  | 61   |
| 69   | 244   | 59   |
| 68   | 5     | 68   |
| 57   | 276   | 61   |
| 57   | 120   | 50   |
| 64   | 220   | 60   |
| 53   | 67    |      |
| 64   | 29    | 67   |
| 94   | 219   | 65   |
| 93.3 | 150.7 | 84.4 |
| 85   | -7    | 85   |
| 57   | 834   |      |
| 45   | 732   | 52.2 |
| 90   | 1970  | 67   |
| 70   | 115   | 61   |
| 50   | 22    | 48   |
| 70   | 208   | 69   |
| 71   | 460   | 49.5 |
| 64   | 495   | 60.8 |
| 60   | -27   | 60   |
| 92   | 71    |      |
| 80   | 24    | 80   |
| 70   | 238   | 58.2 |
| 54.5 | 125   |      |
| 55   | 326   | 40   |
| 63.8 | 243   | 57   |
| 88   | 270   | 66   |
| 88   | 299   |      |
| 73.5 | 420   | 69   |
| 61   | 2     | 61   |

|      |       |      |
|------|-------|------|
| 71   | 450   | 83   |
|      | -59   |      |
|      | 25    |      |
| 45   | 54    | 50   |
| 80   | 115   | 76   |
| 72.3 | 0.0   | 0.0  |
| 85   | 286   | 78   |
| 77.7 | 387   | 65   |
| 81   | -44   | 81   |
| 60   | 2143  | 58   |
| 65   | 0     | 65   |
| 73   | 116   | 65   |
| 75.4 | 269   | 62   |
| 70   | 162   | 69   |
| 49   | 0     | 49   |
| 85.0 | 108.4 | 82.9 |
| 48   | 741   |      |
| 76   | 153   | 73   |
|      | 0     |      |
| 64.5 | 112   | 67   |
| 80.5 | -78   | 80.5 |
| 70.5 | 0.0   | 0.0  |
| 82   | 252   | 52   |
| 71   | 23    | 74   |
| 53   | 661   | 48   |
| 80.1 | 103.9 | 77.7 |
| 82   | 23    | 82   |
| 80   | 451   |      |
| 94   | 433   | 60   |
| 0.0  | 133.2 | 64.2 |
| 55   | 89    | 48   |
|      | 28    | 65   |
| 60   | 2     | 60   |
| 60   | 339   | 58   |
| 60.7 | 0.0   | 0.0  |
| 68   | 1603  | 61   |
| 65   | 174   | 50   |
| 82   | 343   | 71   |
| 75   | 37    | 85.7 |
| 0.0  | 0.0   | 0.0  |
| 79.5 | 132.0 | 78.3 |
| 53   | 429   | 38   |
| 56   | 65    |      |
| 98.5 | 0.0   | 0.0  |
| 60   | 30    | 62   |
|      | 196   | 62   |
| 76   | 23    | 76   |
|      | 54    | 51   |
| 78   | -19   | 78   |
| 73   | 214   | 70   |

|      |      |      |
|------|------|------|
| 58   | 31   | 51   |
| 85   | 146  | 75   |
| 58   | 99   | 52   |
| 53   | 32   | 52   |
| 57.8 | 488  | 65   |
| 94.5 | 0.0  | 0.0  |
| 54   | 201  | 44   |
| 75   | 4    | 75   |
| 71.4 | 0.0  | 0.0  |
| 51   | 29   | 49.5 |
| 52   | 474  | 50   |
| 90.4 | 238  | 78   |
|      | -19  |      |
| 77   | 167  | 72   |
| 62   | 34   | 62   |
| 68   | 66   | 72   |
| 68   | 47   | 62   |
| 61   | -1   | 61   |
| 90   | 118  | 90   |
| 87   | 250  | 80   |
| 93   | 1612 | 95   |
| 71   | 233  | 66   |
| 76   | 635  | 67   |
|      |      |      |
| 77.5 | 94.5 | 69.1 |
| 63   | 539  | 78   |
| 68   | 225  | 45   |
| 93   | 74   | 80   |
| 51   | 379  | 53   |
| 58   | 31   | 56.3 |
| 101  | 627  | 57   |
|      |      |      |
| 50   | 71   | 56.5 |
| 83   | 1518 | 66   |
| 73   | 461  | 75   |
| 56   | 165  | 50   |
| 74.6 | 539  |      |
| 75   | 292  | 63   |
| 0.0  | 0.0  | 0.0  |
| 89   | -11  | 89   |
| 76   | 202  | 72   |
|      |      |      |
| 90   | 164  | 92   |
| 57.5 | 168  | 58   |
| 76   | 1208 | 61   |
| 88   | 565  | 74   |
| 49   | 167  | 42   |
| 70   | 25   | 70   |
| 88   | 33   | 85   |
| 87   | 42   | 85   |

|       |       |      |
|-------|-------|------|
| 79.5  | 0.0   | 0.0  |
| 70.07 | 270   | 60   |
| 73.5  | 1010  | 79   |
| 81    | 51    | 70   |
| 90    | 129   | 70   |
| 63    | 659   | 57   |
| 86    | 122   | 85   |
| 66    | 31    | 68   |
| 80    | 84    | 69   |
| 53    | 294   | 57   |
| 75    | 1401  | 76.5 |
| 80.6  | 0.0   | 0.0  |
| 75    | 169   | 70   |
| 59.0  | 103.7 | 59.5 |
| 64    | 674   | 89   |
| 67    | 23    | 67   |
| 53.5  | 0.0   | 0.0  |
| 80    | 357   | 68   |
| 60    | -2    | 60   |
| 50    | 13    | 50   |
| 73    | 125   | 77   |
| 68.5  | 0.0   | 0.0  |
| 53    | 93    | 53   |
| 70    | -13   | 70   |
| 62    | 414   | 68   |
| 60    | 69    | 60   |
|       | 7     | 115  |
| 68    | 1392  | 80   |
| 74    | 41    | 73   |
| 88    | 27    | 95   |
| 63    | 734   | 60   |
| 78    | 846   | 57   |
| 67    | 574   | 85   |
| 63.3  | 0.0   | 0.0  |
| 54    | 336   | 54   |
| 60.5  | 70    | 55.5 |
| 66    | 424   | 60.3 |
| 77.2  | 112.9 | 77.2 |
| 75    | 2     | 72   |
| 74    | 0     | 74   |
| 61    | 1791  |      |
| 0.0   | 0.0   | 0.0  |
| 71    | 683   |      |
| 0.0   | 101.5 | 71.4 |
| 65    | 690   | 65   |
| 65    | -61   | 65   |
| 67    | 2120  | 67   |
| 75    | 162   | 68   |
| 110   | 1311  | 100  |
| 60    | 79    | 50   |

|      |       |      |
|------|-------|------|
| 54.4 | 346   | 53.7 |
| 56.4 | 0.0   | 0.0  |
| 60   | -30   | 60   |
| 70   | 273   | 70   |
| 93.3 | 0.0   | 0.0  |
| 65   | -383  | 65   |
| 84   | 2021  | 61.9 |
| 55   | 20    |      |
| 67.0 | 102.9 | 74.9 |
| 54   | 13    | 54   |
| 55   | 406   | 55   |
| 60   | 122   | 74   |
| 69.6 | 860   | 65.2 |
| 74   | 0     | 74   |
| 66   | 399   | 60   |
| 75   | 548   | 56.5 |
| 81   | 805   | 65.6 |
| 65   | 155   | 63   |
| 84   | 195   |      |
| 75   | 350   | 65   |
| 60   | 206   | 54   |
| 50   | -63   | 50   |
| 73   | 283   | 59   |
| 79   | 696   | 66   |
| 87   | 7     | 87   |
| 36   | 600   |      |
| 57   | 12    | 58   |
| 48   | 1322  | 46   |
|      | -37   |      |
| 75   | 141   | 75   |
| 67.0 | 124.7 | 68.5 |
| 54.8 | 264   | 55   |
| 96.5 | 140   | 97   |
| 67.4 | 1259  | 72   |
| 65   | 120   | 67.8 |
| 77   | -216  | 77   |
| 60   | 0     | 60   |
| 49   | 55    | 49   |
| 0.0  | 0.0   | 0.0  |
| 69   | -79   | 69   |
| 74   | 663   | 60   |
| 57   | 700   | 57   |
| 63.7 | 154   | 63   |
|      | -25   |      |
| 56   | 388   | 55   |
| 50   | 553   | 40   |
| 85   | 221   | 66.4 |
| 100  | 419   | 68   |
| 77   | 600   | 64   |
| 68.5 | 0.0   | 0.0  |



|       |       |       |
|-------|-------|-------|
| 93    | 553   | 65    |
| 58    | 1408  | 51    |
| 50    | 194   | 47    |
| 74    | -6    | 74    |
| 59    | 495   | 48    |
| 61    | -9    |       |
| 50    | 54    | 47.5  |
|       | 59    | 67    |
| 80.9  | 178.8 | 63.9  |
| 71    | 174   | 55    |
| 55    | 53    | 55    |
| 55.5  | 163   | 48    |
| 110   | 155   | 90    |
| 68    | 35    | 68    |
| 68    | 43    | 65    |
| 86    | 8     | 86    |
| 67.9  | 0.0   | 0.0   |
| 65    | 4     | 65    |
| 79    | -34   | 79    |
|       | 59    | 75    |
| 88.4  | 45    | 77    |
| 40    | 19    | 43.5  |
| 70    | 1904  | 64.5  |
| 68    | 69    | 60    |
| 65    | 641   | 65    |
| 58.5  | -7    | 58.5  |
| 56    | 70    | 56    |
| 67.6  | 58    | 66    |
| 57.2  | 156   | 56    |
| 64.3  | 2197  | 67    |
| 58    | -513  | 58    |
| 68    | 892   | 60    |
| 75.4  | 0.0   | 0.0   |
| 67.1  | 278   | 74    |
| 86    | 2241  | 95    |
| 69    | 129   | 65    |
| 69    | 538   | 70    |
| 87.9  | 0.0   | 0.0   |
| 126.9 | -15   | 126.9 |
| 87    | 63    | 88    |
| 66    | 218   | 58    |
| 43    | 183   | 43    |
| 73.5  | 343   | 56.8  |
| 53.6  | 0     | 53.6  |
| 80    | 119   | 70    |
| 54    | 90    | 66.2  |
| 72    | 923   | 69    |
| 73    | -2114 | 73    |

|      |      |      |
|------|------|------|
| 67   | 54   | 60   |
| 92   | 1943 | 99   |
| 41   | -8   | 41   |
| 57   | 582  | 38   |
| 67   | 86   | 67   |
| 52   | 42   | 52   |
| 51   | 239  | 50   |
| 56   | 5    | 56   |
| 45   | 43   | 47   |
| 122  | -1   | 122  |
| 71   | 481  | 73   |
| 64   | 633  | 54   |
| 61   | 435  | 62   |
| 52   | 100  | 48   |
| 78   | 358  | 79   |
| 60   | 23   | 60   |
| 64.5 | 769  | 52   |
| 59   | 11   | 53.2 |
| 68   | 1742 |      |
| 59   | 523  | 50   |
| 56.4 | 1120 | 52   |
| 69   | 428  | 58   |
| 56   | 190  | 53   |
| 50   | 65   | 50   |
| 76   | 161  | 70   |
| 58   | 101  | 58   |
| 0.0  | 0.0  | 0.0  |
| 87   | 1949 | 70   |
| 55.5 | 596  | 57   |
| 78   | 242  | 70   |
| 75   | 492  | 80   |
| 0.0  | 95.8 | 59.2 |
| 96   | 1556 | 91   |
| 51   | 797  | 40   |
| 49.9 | 80   | 44.2 |
| 45   | 107  | 60.7 |
| 63.5 | 745  | 64   |
| 65   | 932  | 62   |
| 45   | 125  | 60   |
| 60   | -23  | 60   |
| 74   | 43   |      |
|      | 13   |      |
| 85   | -27  | 85   |
| 52   | 78   | 46   |
| 72   | 162  | 58   |
| 74   | 167  | 50   |
| 65   | -198 | 65   |
| 56   | 40   | 60   |
| 66.3 | 604  | 65   |
|      | -34  | 76   |

|      |       |      |
|------|-------|------|
| 68   | 104   | 68   |
|      | -31   |      |
| 72.5 | 0.0   | 0.0  |
| 50   | 225   | 60   |
| 57   | 12    | 64   |
|      | 280   | 49   |
| 63   | 1013  | 59   |
| 60   | 1288  | 64   |
| 55   | 558   | 56   |
| 100  | 37    | 102  |
| 74.5 | 612   |      |
| 86   | 145   | 58   |
| 0.0  | 143.9 | 54.0 |
| 160  | 628   | 49   |
| 68   | 0     | 68   |
| 77   | -653  | 77   |
| 61.0 | 0.0   | 0.0  |
| 50   | 166   | 46.2 |
| 75   | 42    | 68   |
| 70.7 | 348   | 61   |
| 56   | 408   | 52   |
| 54   | 298   | 67   |
| 85   | 573   | 70   |
| 50.7 | 52    | 46   |
| 90   | -28   | 90   |
| 74   | 215   | 62   |
| 98   | 54    | 100  |
| 56   | 98    | 52   |
| 98   | 307   | 91   |
| 69.9 | 0.0   | 0.0  |
| 63   | 0     | 63   |
| 75   | -10   | 75   |
| 90   | 149   | 94   |
| 75   | 767   | 65   |
| 60   | -26   | 60   |
| 88   | 455   | 88   |
| 63   | 628   | 47   |
| 67.0 | 0.0   | 0.0  |
| 57   | 126   | 62   |
|      | 94    | 60   |
| 69   | -524  | 69   |
| 80.9 | 0.0   | 0.0  |
| 54   | 659   | 57   |
| 90.2 | 100.5 | 90.2 |
| 90.8 | 471   | 79   |
| 77   | -25   | 77   |
| 59.5 | 58    | 55.8 |
| 72   | 127   | 60   |
| 54   | 0     | 54   |
| 68   | 863   | 51   |

|      |       |      |
|------|-------|------|
| 53   | 1314  | 55   |
| 70   | 1413  | 74   |
|      | 232   | 57.6 |
| 84   | 135   | 185  |
| 87   | 2188  | 81   |
|      | 391   |      |
| 78   | 419   | 87   |
|      | 628   | 54   |
| 80   | 804   | 70   |
| 57.3 | 1557  |      |
| 53   | 0     | 53   |
| 0.0  | 93.1  | 66.5 |
| 75   | 601   | 85   |
| 69   | 292   | 45   |
|      | 587   | 74   |
| 58   | 1136  | 58   |
| 71   | 21    | 51   |
| 55   | 127   | 49   |
| 55   | 588   | 55   |
| 58   | 490   | 62   |
| 51.9 | 795   |      |
| 64   | 243   | 55   |
| 57   | 861   | 45   |
| 64.4 | 106.0 | 52.9 |
| 72.3 | 287   | 64   |
| 47   | -41   | 47   |
| 40.7 | 210   | 47   |
| 56   | 502   |      |
| 80.3 | 0.0   | 0.0  |
| 56   | 736   | 55   |
| 44.5 | 63    | 44.5 |
| 80   | 1285  |      |
| 59   | 61    | 56.8 |
| 76   | 195   | 73   |
| 75   | -31   | 75   |
| 84   | 727   | 69.3 |
| 86.1 | 219   | 77   |
| 54   | 1756  |      |
| 60   | 78    | 56   |
| 87   | 197   | 90   |
| 68   | 96    | 62   |
| 53   | 479   | 49.5 |
| 60   | 1199  | 58   |
| 55   | 304   | 50   |
| 82.1 | 0.0   | 0.0  |
|      | 1     |      |
|      | -5    |      |
| 92   | -432  | 92   |
| 48   | 48    | 48   |
| 43.9 | 328   |      |

|       |       |      |
|-------|-------|------|
| 94    | 532   | 85   |
| 54    | 179   | 55   |
| 73    | 35    | 66   |
|       | 123   | 44   |
| 55    | 102   | 54   |
|       | 218   |      |
| 85    | 1891  |      |
| 99    | -2506 | 99   |
| 115   | 108   | 115  |
| 100.3 | 104.9 | 74.9 |
| 73.7  | 0.0   | 0.0  |
| 83    | 0     | 83   |
| 84.2  | 91    |      |
|       | 70    | 62   |
| 100   | 63    | 98   |
| 53    | 609   | 50   |
| 66    | 2116  | 55   |
| 80    | 131   | 80   |
| 64    | 105   | 54   |
| 56    | 49    | 48   |
| 84    | 2123  | 82   |
| 110   | -10   | 110  |
| 72    | -678  | 72   |
| 78    | 2194  | 85.3 |
| 53    | 215   | 45   |
| 76    | 2108  | 77.6 |
| 84    | 2185  | 82   |
| 59    | 495   | 67   |
|       | 492   | 65   |
| 71    | -34   | 71   |
| 58    | 18    | 59   |
| 66    | 711   | 50   |
|       | 130   | 61   |
| 59    | 1932  | 64   |
| 65    | 101   | 65   |
| 48.1  | 239   | 53   |
| 76    | 154   | 71   |
| 50    | -404  | 50   |
| 69    | 80    | 63   |
| 55    | 1001  | 42   |
| 63    | 667   | 60   |
| 72    | 68    | 70   |
| 63.9  | 0.0   | 0.0  |
| 92.5  | 2039  | 86   |
| 82    | 234   | 80   |
| 86    | 244   | 78   |
| 76    | 240   | 86   |
| 83    | 40    | 83   |
| 56    | 1190  | 56   |
| 89.9  | 174.4 | 91.9 |

|      |       |      |
|------|-------|------|
| 54   | 1656  | 49   |
| 52   | 1317  |      |
| 76   | 271   | 70   |
| 63   | 200   | 57   |
| 59   | 343   | 53.8 |
| 110  | 99    |      |
|      | 344   | 60   |
| 80   | 931   | 75   |
| 64   | 1524  | 50   |
| 84.9 | 757   | 88   |
| 53   | 1653  | 57   |
| 50   | 79    | 50   |
| 75   | 2213  | 76   |
| 0.0  | 0.0   | 0.0  |
| 62   | 385   |      |
| 75   | 654   | 50.5 |
| 52   | 118   | 45   |
|      | 679   |      |
| 57   | 176   | 52   |
| 84   | -220  | 84   |
| 60   | 249   | 59   |
| 76   | 740   | 80   |
| 75   | 174   | 66   |
| 65   | 55    | 60   |
| 58.1 | 76    | 60   |
| 62   | 143   | 66   |
| 57   | 24    |      |
|      | 0     | 70   |
| 75   | 48    | 77   |
| 54   | 281   | 54   |
| 67.8 | 2031  | 69   |
| 48.4 | 319   | 51   |
| 60   | 588   |      |
| 94.5 | 1524  | 70   |
| 95   | 168   |      |
| 76.2 | 195   | 73   |
| 62.1 | 0.0   | 0.0  |
| 65   | 373   | 59   |
| 110  | 295   | 100  |
| 64   | 491   |      |
| 70   | 444   | 70   |
| 58   | -72   | 58   |
| 88   | 2136  | 89   |
| 64   | 609   | 67.5 |
| 72   | 1400  | 68.4 |
| 74   | 84    | 73   |
| 73   | 109   | 65   |
| 68   | 493   | 63   |
| 54   | 1095  | 49   |
| 97   | -1082 | 97   |

|      |       |      |
|------|-------|------|
| 0.0  | 0.0   | 0.0  |
| 49.3 | 833   | 44   |
| 76.5 | 537   | 76.5 |
| 51.5 | 11    | 52   |
| 83.8 | 0.0   | 0.0  |
| 60.5 | 246   | 50   |
| 0.0  | 154.7 | 80.1 |
| 70   | 404   | 63.3 |
| 62.3 | -736  | 62.3 |
| 90   | 556   | 75   |
| 79   | 1570  | 84   |
|      | -16   |      |
| 53.7 | 250   |      |
| 80   | 273   | 80   |
| 66   | 1575  | 65   |
| 47   | 300   | 44   |
| 62   | 21    | 62   |
| 73.8 | 441   | 48.5 |
| 72.3 | 0.0   | 0.0  |
| 48   | 0     | 48   |
| 49   | 2045  | 55   |
| 62   | 180   | 60   |
| 84   | -621  | 84   |
| 49   | 161   | 56   |
| 74   | 142   | 77.8 |
| 51   | 129   | 52   |
| 76   | 765   | 50   |
| 92   | 2028  | 68   |
| 42   | 0     | 42   |
| 63   | 55    | 63   |
| 77.5 | 95.8  | 88.1 |
| 86   | 2082  | 83.3 |
| 90   | 1994  | 75   |
| 50   | -68   | 50   |
| 76   | -233  | 76   |
| 59.0 | 0.0   | 0.0  |
| 60   | 453   | 70   |
|      | 35    | 62   |
| 70   | 48    |      |
| 78   | 43    | 70.9 |
| 74   | 240   | 75   |
| 78.8 | 414   | 80   |
| 59.4 | 199   | 57   |
| 76   | 152   | 55   |
| 108  | 439   |      |
| 61   | 142   | 58   |
| 74   | 0     | 74   |
| 66.6 | 0     | 66.6 |

|      |      |      |
|------|------|------|
| 77   | -12  | 77   |
| 90   | 239  | 87   |
|      | 140  | 63.3 |
| 54   | 473  | 48   |
| 75.1 | 0.0  | 0.0  |
| 123  | 137  | 100  |
| 72   | 943  | 59   |
| 69   | 131  | 63   |
| 63   | -268 | 63   |
| 81   | 27   | 82   |
| 74   | 89   | 72   |
| 62.8 | 47   | 52.9 |
| 66   | 492  | 60   |
| 58   | 32   | 58   |
| 69.6 | 0.0  | 0.0  |
| 54.5 | 606  | 60   |
| 54   | 331  |      |
| 59   | 1329 | 53   |
| 64   | 211  | 69   |
| 55   | 283  | 47.7 |
| 94   | 978  | 88   |
| 64.3 | 98   | 55   |
| 87   | 136  | 74   |
| 57   | -56  | 57   |
| 79   | 54   | 73   |
| 59   | 134  | 60   |
| 72   | -109 | 72   |
| 78   | 1623 | 80   |
| 65   | 719  | 59.7 |
| 100  | 40   | 89   |
| 58   | 118  | 58.5 |
| 86   | 302  | 79   |
| 67.4 | 518  | 56   |
| 73.4 | 0.0  | 0.0  |
| 108  | 456  | 87   |
| 53   | 34   | 53   |
| 71   | 339  | 54   |
| 80.6 | 92.8 | 61.3 |
|      | 1599 | 43   |
| 47   | -80  | 47   |
| 0.0  | 0.0  | 0.0  |
| 54   | 175  | 42   |
| 74   | 137  | 60   |
| 59   | 864  | 66   |
| 75   | -284 | 75   |
| 60.5 | 717  | 65.8 |
| 58   | 1662 |      |
| 51   | 83   | 45.3 |



|      |       |      |
|------|-------|------|
| 77   | 791   | 80   |
| 80   | 347   | 67   |
|      | 80    | 62   |
|      | 1607  | 66   |
| 0.0  | 124.6 | 63.0 |
| 81   | 101   | 81.8 |
| 57.5 | 453   | 51   |
| 0.0  | 177.0 | 56.6 |
| 60   | 38    | 60   |
| 65   | 122   | 65   |
| 43   | 205   | 40   |
| 68   | 576   |      |
|      | -2    |      |
|      | 2202  | 70   |
| 60   | 241   | 53   |
|      | 959   |      |
| 80   | 1484  | 62.2 |
| 68   | 303   | 57.5 |
| 65   | 1457  | 63.7 |
|      | 277   | 70   |
| 46   | 239   | 52.5 |
| 37.3 | 231   | 41   |
| 71   | 255   | 59   |
| 92   | 1975  | 92   |
| 65   | -999  | 65   |
|      | 162   | 71   |
| 83.6 | 230   | 72   |
| 82   | 134   | 84   |
|      | 1364  | 84   |
| 75   | -1921 | 75   |
| 60   | 30    | 60   |
| 70   | 532   | 68   |
| 50   | 282   | 60   |
| 62   | 127   | 66   |
| 86   | -317  | 86   |
| 76.7 | 1014  | 84   |
| 80   | 316   | 63.1 |
| 56   | 611   | 51   |
| 77   | 668   | 75   |
| 76   | 112   | 67   |
| 51   | 51    | 51.9 |
| 79   | 911   | 78   |
| 91   | 2005  | 92   |
| 52   | 81    | 49   |
| 97   | 831   | 95   |
| 55   | 258   |      |
| 68.2 | 101.6 | 67.0 |

|       |       |      |
|-------|-------|------|
| 65    | 313   |      |
|       | 198   |      |
| 83    | 1546  | 79.5 |
| 85    | -39   | 85   |
| 44    | 90    | 45   |
| 67    | 45    | 66   |
| 68    | 133   |      |
| 62.1  | 0.0   | 0.0  |
| 75    | 22    | 71.2 |
| 69.6  | 0.0   | 0.0  |
| 70    | 11    | 70   |
| 64    | 989   | 58   |
| 85.8  | 1141  | 81.3 |
| 78    | 357   | 76   |
| 72.8  | 2071  | 68.4 |
| 58    | 74    |      |
| 0.0   | 0.0   | 0.0  |
| 97.7  | 1729  | 92   |
| 73.7  | 525   | 76   |
| 92    | 1588  | 83   |
| 0.0   | 0.0   | 0.0  |
| 105.2 | 0.0   | 0.0  |
| 51    | 482   | 40   |
| 95    | 492   | 100  |
| 47    | 51    | 50   |
| 65    | 740   | 57   |
| 66    | 507   | 54   |
| 70    | 1741  | 70   |
| 65    | 167   | 69.5 |
| 54    | 1083  | 48.8 |
| 87    | 323   | 75   |
| 79    | 199   |      |
| 53    | 398   | 47   |
| 67    | 141   | 63   |
| 72    | 109   | 72   |
| 92    | 805   | 77.5 |
| 85    | 219   | 100  |
| 53    | 235   | 40.8 |
| 100   | 880   | 106  |
| 57    | 1092  | 49   |
| 76    | 354   | 70   |
| 63    | 496   | 65   |
| 49    | 163   | 45   |
| 65.6  | 124.8 | 57.2 |
| 66    | 210   | 52   |
| 75    | 132   | 66   |
| 82    | 902   | 70   |
| 105   | -26   | 105  |
| 0.0   | 0.0   | 0.0  |

|      |       |      |
|------|-------|------|
|      | 254   | 48.1 |
| 46.7 | 156   | 42   |
| 56   | 214   | 50   |
| 83   | 36    | 85   |
| 72   | 1515  | 72   |
| 105  | 258   | 85   |
| 75   | 338   |      |
| 64   | 311   | 50   |
| 96.8 | 196   | 73   |
| 56   | 284   | 46.7 |
| 57.2 | 498   | 54   |
| 39   | 36    | 39   |
| 65   | 225   | 57   |
| 80.1 | 0.0   | 0.0  |
| 92   | 1970  | 60   |
| 51   | 1904  | 52   |
| 78   | 974   | 61   |
| 54   | 194   | 58   |
| 57   | 616   | 46   |
| 83   | 1716  | 87.4 |
| 66   | 195   |      |
| 60   | 732   | 60   |
| 35   | 120   | 35   |
| 73   | 402   |      |
|      | 371   | 51   |
| 170  | 433   | 70   |
| 80   | 44    | 80   |
| 72.3 | 0.0   | 0.0  |
| 85   | 799   | 70   |
| 54   | 83    | 45.5 |
| 73   | 11    | 73   |
| 0.0  | 92.6  | 62.4 |
| 67   | 943   | 50   |
| 85   | 661   | 68   |
| 57   | 384   | 58   |
| 55   | 528   | 38   |
| 89   | 1108  | 95   |
| 58   | 834   | 45   |
| 68   | 279   |      |
| 67.0 | 138.7 | 63.6 |
| 93   | 1737  | 92   |
| 42   | 668   | 32   |
|      | 922   | 50   |
|      | 418   | 49   |
| 60   | 0     | 60   |
| 70   | 371   | 67   |
| 55   | 472   | 50   |
| 69   | 621   | 65.6 |

|      |      |      |
|------|------|------|
| 71.9 | 107  | 72   |
| 67   | 1900 | 66   |
| 90   | 1493 | 77   |
| 53   | 288  | 46   |
| 88   | 0    | 88   |
| 65   | 573  | 70.3 |
| 64.3 | 451  | 60   |
| 57   | 512  | 50   |
| 0.0  | 0.0  | 0.0  |
| 57   | 345  | 49   |
| 64   | 425  | 63.2 |
| 61   | 1700 | 60   |
| 68   | 239  |      |
| 80   | 69   | 84   |
| 71   | 1512 | 72   |
| 67   | 310  | 67   |
| 82   | 782  | 77   |
| 48   | 381  | 38   |
| 80   | 476  | 69   |
| 53   | 157  | 51   |
| 87   | 83   | 85   |
| 59   | 171  | 55   |
| 56   | 306  | 58   |
| 86   | 217  | 75   |
| 75   | 1146 | 82   |
| 57.8 | 0.0  | 0.0  |
| 62.4 | 0    | 62.4 |
| 78   | 83   | 72   |
| 70   | 403  |      |
| 70   | -696 | 70   |
| 75   | 322  | 73   |
| 0.0  | 0.0  | 0.0  |
| 62   | -38  | 62   |
|      | 925  | 65   |
| 57   | 1    | 58.3 |
|      | 287  | 100  |
| 0.0  | 0.0  | 0.0  |
| 64   | 170  | 58   |
| 48   | 434  | 36   |
| 73.5 | 1030 | 73.6 |
| 78   | 460  | 63   |
| 65   | 273  | 57   |
| 61   | 79   | 55.2 |
| 72   | 0    | 72   |
| 93   | 2098 | 99.2 |
| 72   | 510  | 52   |
| 53.5 | 517  | 61   |
| 62   | 57   | 60   |
| 100  | -227 | 100  |
| 85   | 2152 | 71   |

|      |       |      |
|------|-------|------|
| 0.0  | 0.0   | 0.0  |
| 70   | 228   | 53   |
| 74   | 392   | 55   |
| 0.0  | 125.1 | 65.0 |
| 65   | 328   | 48   |
| 71   | 203   | 65   |
| 64   | 456   | 51   |
| 65.7 | 253   | 68   |
| 68   | 488   | 59   |
| 60   | 13    | 70   |
| 75.4 | 91.6  | 77.5 |
| 57.6 | 252   | 44   |
| 58.2 | 11    | 58   |
| 62.3 | 259   | 52   |
| 76   | 380   | 58   |
| 64   | 394   | 62   |
| 102  | 410   |      |
| 73   | -251  | 73   |
| 74   | 11    | 73   |
| 89   | 228   | 72   |
| 72   | 16    | 69.9 |
| 53   | 91    | 50   |
| 99   | 760   | 85   |
| 69   | 704   | 63   |
| 90.9 | 208   | 83   |
| 57   | 967   |      |
| 85   | 343   | 67   |
| 66   | -3049 | 66   |
| 110  | -19   | 110  |
| 98.5 | 351   | 74   |
| 76   | 797   | 68   |
| 66   | 1012  | 58   |
| 75.5 | 231   | 65   |
| 69.9 | 0.0   | 0.0  |
| 60   | 207   | 48.5 |
| 74   | 741   | 55   |
| 79   | 1050  | 65   |
| 66   | 104   | 60   |
| 92   | 104   | 84   |
| 64   | 1069  | 58   |
| 80   | 349   | 72   |
| 64   | 740   | 49   |
| 89   | 27    | 89   |
| 85   | 538   | 82   |
| 72.2 | 2227  | 68   |
| 59   | 799   | 50   |
| 92   | 1262  | 104  |
| 81.8 | 102.5 | 75.7 |
| 54   | 39    | 54   |
| 50   | 478   | 40   |

|      |       |      |
|------|-------|------|
| 58   | 35    |      |
| 61   | 335   | 56   |
| 54   | 415   | 53   |
| 62   | 342   | 58   |
| 56   | 0     | 56   |
| 69   | 39    | 70   |
| 57.3 | 1648  | 52   |
| 53   | 191   | 44.2 |
| 63   | 99    | 64   |
| 45   | 1136  | 37.5 |
| 65   | 290   | 61   |
| 82.1 | 0.0   | 0.0  |
| 55.2 | 0.0   | 0.0  |
| 58   | 269   | 56   |
| 68   | 71    | 62   |
| 73.1 | 580   | 70   |
| 81   | 446   | 74   |
| 66   | 1667  |      |
| 82   | 16    | 82   |
| 67   | 234   | 61   |
| 75   | 332   |      |
| 82   | 168   | 82.8 |
| 69   | 73    | 61   |
| 65   | -25   | 65   |
| 60   | 1576  | 54   |
| 66   | 161   | 75   |
| 63   | -1448 | 63   |
| 74   | 203   | 74   |
| 83   | 1268  | 55   |
| 73   | 519   | 60   |
| 68   | 1354  | 66.4 |
| 61   | 229   | 56   |
| 81   | 2089  | 59   |
| 53   | 144   | 45   |
| 75   | 1277  | 57   |
| 78   | 6     | 78   |
| 57   | 515   | 52   |
| 57   | 2255  | 54   |
| 65   | 0     | 65   |
| 57   | 212   | 57   |
| 87   | 48    | 88   |
| 65.0 | 0.0   | 0.0  |
| 80.9 | -27   | 80.9 |
| 92   | 217   | 79   |
| 60   | -30   | 60   |
| 75.5 | 1692  | 76   |
| 52   | 340   | 45.7 |
| 66   | -1412 | 66   |
| 66.7 | 847   | 62   |

|       |      |      |
|-------|------|------|
| 58    | 82   | 49.9 |
| 69.8  | 169  | 65   |
| 110   | 73   | 114  |
|       | -23  | 75   |
| 85    | 329  | 60   |
| 113.9 | 0.0  | 0.0  |
| 67    | 1022 | 52   |
|       | 0    | 69   |
| 68    | 832  | 73   |
| 55    | 1507 | 51   |
| 56    | 230  | 56   |
| 75.6  | 90   | 68   |
| 63    | 28   | 64   |
| 60    | 1323 | 54   |
| 53    | 841  | 49   |
| 77.2  | 92.6 | 74.3 |
| 83.5  | 652  | 80   |
| 98    | 1818 | 98   |
| 78    | 52   | 68   |
| 78    | 568  | 77   |
| 83.9  | 1323 | 74   |
| 57    | 0    | 57   |
| 80    | 283  | 80   |
|       | -38  |      |
| 73    | 496  | 65   |
| 55    | 61   | 54   |
| 80    | 386  | 65   |
| 70    | 327  | 70   |
|       | 329  |      |
| 83    | 135  |      |
| 65    | 431  | 60   |
| 57    | 603  | 57   |
| 75    | 130  | 61   |
| 63    | 169  | 62   |
| 75.3  | 111  | 69.6 |
| 91    | 236  | 83   |
|       | 1664 |      |
| 79    | 1    | 80   |
| 67    | 621  | 50   |
| 0.0   | 0.0  | 0.0  |
| 76    | 196  | 68   |
| 72    | -28  | 72   |
| 63.9  | 0.0  | 0.0  |
| 86    | 83   | 75   |
| 66.2  | 0.0  | 0.0  |
| 94    | -28  | 94   |
| 50    | 75   | 44   |
| 87    | 308  | 96   |
| 70    | 30   | 70   |
| 69    | 0    | 69   |

|      |       |      |
|------|-------|------|
| 71   | 205   | 64   |
| 78   | 80    | 68   |
| 61   | 424   | 54   |
| 97   | 282   | 83   |
| 57   | 560   | 53   |
|      | 446   | 73   |
| 70.8 | 120.8 | 69.1 |

Legend Supplementary Table S1: Data collected from the medical records of PDAC patients from Sheba and Souraski Oncology Medical Centers.
