# Supplementary material for: Early Infiltration of Innate Immune Cells to the Liver Depletes HNF4α and Promotes Extrahepatic Carcinogenesis
Source: PubMed Central journal article supplement — Cancer Discov. 2023 Mar 27;13(7):1616–35. doi: 10.1158/2159-8290.CD-22-1062 (PMC10326600; doi:10.1158/2159-8290.cd-22-1062), 2023-03-27
Supplement: cd-22-1062_supplementary_table_s3_suppst3.pdf [file cd-22-1062_supplementary_table_s3_suppst3.pdf]

Supplementary Table S3- Western blot Antibodies

| <b>Ab</b>     | <b>Company</b>           | <b>CAT</b> | <b>PMID</b>        |
|---------------|--------------------------|------------|--------------------|
| p97           | Thermo Fisher Scientific | PA5-22257  | 30100185, 26560030 |
| ASS1          | Abcam                    | ab124465   | 33369168, 33838671 |
| OTC           | Abcam                    | ab203859   | 32353864, 30737497 |
| Actin         | Sigma-Aldrich            | A5441      | 36484383, 36650267 |
| TFAM          | Cell Signaling           | #8076      | 34956192, 34467247 |
| pSTAT3        | Cell Signaling           | #9145      | 34938610, 35020440 |
| STAT3         | Cell Signaling           | #12640     | 34976224, 34921114 |
| HNF4 $\alpha$ | Abcam                    | ab181604   | 33712578, 33846641 |
| PCNA          | Cell Signaling           | #13110     | 36382649, 36460337 |
| CAD           | Cell Signaling           | #11933     | 34303878, 34000301 |
| pCAD          | Cell Signaling           | #12662     | 36256480, 36256480 |
