# Supplementary material for: Early Infiltration of Innate Immune Cells to the Liver Depletes HNF4α and Promotes Extrahepatic Carcinogenesis
Source: PubMed Central journal article supplement — Cancer Discov. 2023 Mar 27;13(7):1616–35. doi: 10.1158/2159-8290.CD-22-1062 (PMC10326600; doi:10.1158/2159-8290.cd-22-1062), 2023-03-27
Supplement: cd-22-1062_supplementary_table_s4_suppst4.pdf [file cd-22-1062_supplementary_table_s4_suppst4.pdf]

Supplementary Table S4: Primers list

| species |          |          | F                            |
|---------|----------|----------|------------------------------|
| M       | RNA      | ASS1     | TGTTCCGCCACTGTATCCAGAAGTC-3' |
| M       | RNA      | OTC      | ACACTGTTTGCCTAGAAAGCC        |
| M       | RNA      | ASL      | CGGACTCCTGATGACCCTCAAGT      |
| M       | RNA      | CPS1     | ACATGGTGACCAAGATTCCTCG       |
| M       | RNA      | ORNT     | AGATAGCGGCCAGTCAGAATA        |
| M       | RNA      | ARG 1    | TGTCCCTAATGACAGCTCCTT        |
| M       | RNA      | TFAM     | AACACCCAGATGCAAACTTTCA       |
| M       | RNA      | HNF4a    | CACGCGGAGGTCAAGCTAC          |
| M       | RNA      | CCL2     | AAAACACGGGACGAGAAACCC        |
| M       | RNA      | Alb      | TGCTTTTTCCAGGGGTGTGTT        |
| M       | RNA      | HPRT     | TCTGGTAGATTGTCGCTTATCTTG     |
| M       | mtDNA    | D-loop 1 | AATCTACCATCCTCCGTGAAACC      |
| M       | mtDNA    | ND4      | AACGGATCCACAGCCGTA           |
| M       | mtDNA    | Cyt B    | GCTTTCCACTTCATCTTACCATTTA    |
| M       | nDNA     | Tert     | CTAGCTCATGTGTCAAGACCCTCTT    |
| M       | nDNA     | Glucagon | CAGGGCCATCTCAGAACC           |
| M       | microRNA | miR 24   | UGGCUCAGUUCAGCAGGAACAG       |

R

|                              |
|------------------------------|
| CCGCTCCTCTTTGTCAGGGTCTA      |
| CCATGACAGCCATGATTGTCC        |
| TGTACTGTTCCACGCTGTGACTGT     |
| TTCCTCAAAGGTGCGACCAAT        |
| CTCAGTTCATAGCCACCAAAGAA      |
| GATCCACCCAAATGACACAT         |
| GACTTGGAGTTAGCTGCTCTT        |
| CCCAGAGATGGGAGAGGTGAT        |
| ACGGGAACCTTTATTAACCCCT       |
| TTACTTCCTGCACTAATTTGGCA      |
| TAGATGCTGTTACTGATAGGAAATCGAG |
| TCAGTTTAGCTACCCCAAGTTTAA     |
| AGTCCTCGGGCCATGATT           |
| TGTTGGGTTGTTTGATCCTG         |
| GCCAGCACGTTTCTCTCGTT         |
| GCTATTGGAAAGCCTCTTGC         |
|                              |
