# Supplementary material for: Early Infiltration of Innate Immune Cells to the Liver Depletes HNF4α and Promotes Extrahepatic Carcinogenesis
Source: PubMed Central journal article supplement — Cancer Discov. 2023 Mar 27;13(7):1616–35. doi: 10.1158/2159-8290.CD-22-1062 (PMC10326600; doi:10.1158/2159-8290.cd-22-1062), 2023-03-27
Supplement: cd-22-1062_supplementary_table_s5_suppst5.pdf [file cd-22-1062_supplementary_table_s5_suppst5.pdf]

Supplementary Table S5- FACS Antibodies

| <b>Ab</b>   | <b>Company</b>   | <b>CAT</b>        | <b>Fluorophore</b> | <b>PMID</b>        |
|-------------|------------------|-------------------|--------------------|--------------------|
| CD11b       | Biolegend        | BLG-101257        | BV605              | 30318149, 29858010 |
| Ly-6G       | Biolegend        | BLG-127617        | PE-Cy7             | 30926232, 30327417 |
| CXCR2       | Biolegend        | BLG-149303        | PE                 | 34033752, 32966785 |
| <b>cKIT</b> | <b>Biolegend</b> | <b>BLG-105837</b> | <b>APC-Cy7</b>     |                    |
| <b>pERK</b> | <b>Biolegend</b> | <b>BLG-369510</b> | <b>BV421</b>       |                    |
| CD8         | Biolegend        | BLG-102007        | APC                | 31216480, 33789089 |
| CD25        | Biolegend        | BLG-100711        | PE                 | 34019807, 33951438 |
| Live Dead   | Biolegend        | BLG               | DAPI               | 31969567, 32989251 |
| Ly-6C       | Biolegend        | BLG-128044        | PE-Dazzle          | 32970988, 32923118 |
| CCR2        | Biolegend        | BLG-150608        | FITC               | 31827233, 30920389 |
| CD115       | eBioscience      | 17115282          | APC                | 28871174, 31978760 |
| CXCR4       | Biolegend        | BLG-146511        | BV421              | 33508229, 32732867 |
| Live Dead   | Invitrogen       | L34957            | BV510              | 19380804, 19168629 |
| CD45        | Biolegend        | BLG-103128        | Alexa 700          | 35352063, 33730589 |
| TCRb        | Biolegend        | BLG-109228        | PerCP-Cy5.5        | 36110849, 33979626 |
| B220        | Biolegend        | BLG-103241        | BV650              | 35931682, 34081922 |
| Ly-6G       | Biolegend        | BLG-127614        | APC                | 35443048, 33653716 |
| CD11c       | Biolegend        | BLG-117343        | BV421              | 35087093, 36071032 |
| CD19        | Biolegend        | BLG-152406        | PerCP              | 36379959, 36379959 |
| CD45        | Biolegend        | BLG-103107        | FITC               | 34297917, 33893298 |
