# Supplementary material for: Early Infiltration of Innate Immune Cells to the Liver Depletes HNF4α and Promotes Extrahepatic Carcinogenesis
Source: PubMed Central journal article supplement — Cancer Discov. 2023 Mar 27;13(7):1616–35. doi: 10.1158/2159-8290.CD-22-1062 (PMC10326600; doi:10.1158/2159-8290.cd-22-1062), 2023-03-27
Supplement: cd-22-1062_supplementary_table_s6_suppst6.pdf [file cd-22-1062_supplementary_table_s6_suppst6.pdf]

Supplementary Table S6- CyTOF antibodies

| <b>Marker</b>    | <b>Channel</b> |
|------------------|----------------|
| CD45             | 89Y            |
| Ly-6G            | 141Pr          |
| CD11c            | 142Nd          |
| CD115            | 144Nd          |
| CD4              | 145Nd          |
| F4/80            | 146Nd          |
| CD11b            | 148Nd          |
| CD19             | 149Sm          |
| CD24             | 150Nd          |
| CD64             | 151Eu          |
| CD3              | 152Sm          |
| CD123            | 154Sm          |
| CCR2             | 158Gd          |
| CD62L            | 160Gd          |
| TimD4            | 161Dy          |
| Ly-6C            | 162Dy          |
| CX3CR1           | 164Dy          |
| CD31 (PECAM-1)   | 165Ho          |
| CD8              | 168Er          |
| CD206            | 169Tm          |
| NK1.1            | 170Er          |
| CD80             | 171Yb          |
| CD86             | 172Yb          |
| B220             | 176Yb          |
| MHC-II (I-A/I-E) | 209Bi          |
| Staining Buffer  |                |
